# Supplementary material for: Characterization of Self-reported Improvements in Knowledge and Health Among Users of Flo Period Tracking App: Cross-sectional Survey
Source: PubMed Central journal article supplement (PMC10173043; doi:10.2196/40427), 2023-04-26
Supplement: mhealth_v11i1e40427_app2.pdf [file mhealth_v11i1e40427_app2.pdf]

**Multimedia Appendix 2.** Flo users' app use characteristics.

| <b>Question</b>                                                     | <b>Frequency, n (%)</b> |
|---------------------------------------------------------------------|-------------------------|
| <b>How long have you been using the Flo App?</b>                    |                         |
| Up to one month                                                     | 69 (3.1)                |
| 1 - 3 Months                                                        | 190 (8.6)               |
| 4 - 6 Months                                                        | 221 (10.0)              |
| 7 - 12 Months                                                       | 350 (15.8)              |
| More than a year                                                    | 1305 (59.0)             |
| I don't remember                                                    | 77 (3.5)                |
| <b>How often, on average, do you use the Flo App?</b>               |                         |
| Several times a day                                                 | 666 (30.1)              |
| Several times a week                                                | 984 (44.5)              |
| Once a week                                                         | 200 (9.0)               |
| 1 - 2 times per month                                               | 244 (11.0)              |
| 1 - 2 times every three months                                      | 14 (0.6)                |
| 1 - 2 times every six months                                        | 1 (0.05)                |
| 1 - 2 times per year                                                | 5 (0.2)                 |
| Other                                                               | 98 (4.4)                |
| <b>Do you use the Free or Premium version?</b>                      |                         |
| Premium                                                             | 1079 (48.8)             |
| Free                                                                | 915 (41.4)              |
| I used to own Premium                                               | 154 (7.0)               |
| I don't know                                                        | 64 (2.9)                |
| <b>How long have you been paying for a Flo Subscription?.</b>       |                         |
| Up to one month                                                     | 151 (12.2)              |
| 1 - 3 Months                                                        | 195 (15.8)              |
| 4 - 6 Months                                                        | 180 (14.6)              |
| 7 - 12 Months                                                       | 381 (30.9)              |
| More than a year                                                    | 215 (17.4)              |
| I don't remember                                                    | 128 (10.4)              |
| <b>How did you sign up to Flo Premium?.</b>                         |                         |
| After free trial                                                    | 747 (60.6)              |
| Without free trial                                                  | 277 (22.5)              |
| I don't remember                                                    | 209 (17.0)              |
| <b>What do you use the Flo App for?</b>                             |                         |
| Menstrual Cycle and Symptom Tracking                                | 1794 (81.1)             |
| Help get Pregnant                                                   | 1191 (53.8)             |
| Learn more about my body                                            | 914 (41.3)              |
| Pregnancy Tracking                                                  | 824 (37.3)              |
| Tailored Health Information                                         | 733 (33.1)              |
| Sexual Health                                                       | 625 (28.3)              |
| Irregular Cycle/Related Conditions                                  | 473 (21.4)              |
| Help not get Pregnant                                               | 250 (11.3)              |
| Pregnancy Loss                                                      | 151 (6.8)               |
| <b>How likely are you to recommend the Flo App to your friends?</b> |                         |
| Very Likely                                                         | 966 (43.7)              |
| Likely                                                              | 906 (41.0)              |
| Neither Likely nor unlikely                                         | 272 (12.3)              |
| Unlikely                                                            | 34 (1.5)                |
| Very Unlikely                                                       | 34 (1.5)                |

• Number of Respondents for these questions was 1,233. As only Premium and Used to be Premium users were asked.
