# Supplementary material for: Characterization of Self-reported Improvements in Knowledge and Health Among Users of Flo Period Tracking App: Cross-sectional Survey
Source: PubMed Central journal article supplement (PMC10173043; doi:10.2196/40427), 2023-04-26
Supplement: mhealth_v11i1e40427_app3.pdf [file mhealth_v11i1e40427_app3.pdf]

**Multimedia appendix 3.** List of high-income countries and total number of users.

| <b>High-income country</b> | <b>Number of users</b> |
|----------------------------|------------------------|
| United States of America   | 758                    |
| United Kingdom             | 217                    |
| Canada                     | 121                    |
| Australia                  | 92                     |
| Netherlands                | 32                     |
| Ireland                    | 31                     |
| Germany                    | 30                     |
| Czech Republic             | 16                     |
| Romania                    | 17                     |
| United Arab Emirates       | 16                     |
| Belgium                    | 12                     |
| Greece                     | 12                     |
| New Zealand                | 11                     |
| France                     | 9                      |
| Slovenia                   | 9                      |
| Lithuania                  | 8                      |
| Singapore                  | 8                      |
| Hungary                    | 7                      |
| Italy                      | 7                      |
| Spain                      | 7                      |
| Sweden                     | 7                      |
| Barbados                   | 6                      |
| Croatia                    | 6                      |
| Latvia                     | 6                      |
| Poland                     | 6                      |
| Denmark                    | 5                      |
| Finland                    | 5                      |
| Norway                     | 5                      |
| Saudi Arabia               | 5                      |
| Switzerland                | 5                      |
| Israel                     | 4                      |
| Malta                      | 4                      |
| Portugal                   | 4                      |
| Iceland                    | 3                      |
| Japan                      | 3                      |
| Luxembourg                 | 3                      |
| Qatar                      | 3                      |
| Austria                    | 2                      |
| Cyprus                     | 2                      |
| Korea Republic             | 2                      |
| Antigua and Barbuda        | 1                      |
| British Virgin Islands     | 1                      |
| Kuwait                     | 1                      |
| Oman                       | 1                      |
| Saint Kitts and Nevis      | 1                      |

|                  |   |
|------------------|---|
| Slovakia         | 1 |
| Turks and Caicos | 1 |

---
