# Supplementary material for: Characterization of Self-reported Improvements in Knowledge and Health Among Users of Flo Period Tracking App: Cross-sectional Survey
Source: PubMed Central journal article supplement (PMC10173043; doi:10.2196/40427), 2023-04-26
Supplement: mhealth_v11i1e40427_app4.pdf [file mhealth_v11i1e40427_app4.pdf]

**Multimedia appendix 4.** List of low- and middle-income countries and total number of users.

| <b>Low- and middle-income</b>    | <b>Number of users</b> |
|----------------------------------|------------------------|
| India                            | 108                    |
| South Africa                     | 86                     |
| Nigeria                          | 82                     |
| Ghana                            | 63                     |
| Philippines                      | 43                     |
| Kenya                            | 26                     |
| Pakistan                         | 24                     |
| Jamaica                          | 18                     |
| Trinidad and Tobago              | 15                     |
| Indonesia                        | 13                     |
| Zambia                           | 13                     |
| Uganda                           | 12                     |
| Sri Lanka                        | 9                      |
| Serbia                           | 8                      |
| Malaysia                         | 8                      |
| Egypt                            | 8                      |
| Belarus                          | 7                      |
| Bulgaria                         | 7                      |
| Zimbabwe                         | 7                      |
| Brazil                           | 6                      |
| Nepal                            | 6                      |
| United Republic of Tanzania      | 6                      |
| Russian Federation               | 5                      |
| Mauritius                        | 5                      |
| Mexico                           | 5                      |
| Georgia                          | 5                      |
| Bosnia and Herzegovina           | 4                      |
| Saint Vincent and the Grenadines | 4                      |
| Lebanon                          | 4                      |
| Suriname                         | 4                      |
| Ukraine                          | 4                      |
| Bangladesh                       | 4                      |
| Iraq                             | 4                      |
| Albania                          | 4                      |
| Iran                             | 4                      |
| Belize                           | 4                      |
| Thailand                         | 3                      |
| Bahamas                          | 3                      |
| Turkey                           | 3                      |
| Algeria                          | 3                      |
| Jordan                           | 3                      |
| Namibia                          | 3                      |
| Maldives                         | 3                      |
| Brunei Darussalam                | 2                      |
| Sierra Leone                     | 2                      |

|                                  |   |
|----------------------------------|---|
| Estonia                          | 2 |
| Guyana                           | 2 |
| Gambia                           | 2 |
| Cameroon                         | 2 |
| China                            | 2 |
| Republic of Moldova              | 2 |
| Haiti                            | 2 |
| Malawi                           | 2 |
| Lesotho                          | 2 |
| Cuba                             | 1 |
| Grenada                          | 1 |
| Democratic Republic of the Congo | 1 |
| Saint Lucia                      | 1 |
| Uzbekistan                       | 1 |
| Armenia                          | 1 |
| Honduras                         | 1 |
| Tunisia                          | 1 |
| Morocco                          | 1 |
| Micronesia (Federated States of) | 1 |
| Vietnam                          | 1 |
| Somalia                          | 1 |
| Swaziland                        | 1 |
| Liberia                          | 1 |
| Ethiopia                         | 1 |
| Burundi                          | 1 |
| Macedonia                        | 1 |
| Rwanda                           | 1 |
| Bahrain                          | 1 |
| Papua New Guinea                 | 1 |
| Botswana                         | 1 |
| Sudan                            | 1 |
| Azerbaijan                       | 1 |
| Myanmar                          | 1 |

---
