# Supplementary material for: Characterization of Self-reported Improvements in Knowledge and Health Among Users of Flo Period Tracking App: Cross-sectional Survey
Source: PubMed Central journal article supplement (PMC10173043; doi:10.2196/40427), 2023-04-26
Supplement: mhealth_v11i1e40427_app5.pdf [file mhealth_v11i1e40427_app5.pdf]

**Multimedia appendix 5.**

**Table S1.** Cycle health responses.

| <b>Question</b> |                                                                             |                                    |                                      |                                   | <b>Response</b>                          |
|-----------------|-----------------------------------------------------------------------------|------------------------------------|--------------------------------------|-----------------------------------|------------------------------------------|
| 16              | <b>Yes, n (%)</b><br>1270 (77.3)                                            |                                    |                                      |                                   | <b>No, n (%)</b><br>372 (22.7)           |
| 17              | <b>Symptom</b>                                                              |                                    |                                      |                                   | <b>Frequency, n (%)</b>                  |
|                 | Cramp                                                                       |                                    |                                      |                                   | 618 (48.7)                               |
|                 | Tender Breasts                                                              |                                    |                                      |                                   | 393 (30.9)                               |
|                 | Acne                                                                        |                                    |                                      |                                   | 312 (24.6)                               |
|                 | Backache                                                                    |                                    |                                      |                                   | 332 (26.1)                               |
|                 | Fatigue                                                                     |                                    |                                      |                                   | 398 (31.3)                               |
|                 | Nausea                                                                      |                                    |                                      |                                   | 224 (17.6)                               |
|                 | Bloating                                                                    |                                    |                                      |                                   | 425 (33.5)                               |
|                 | Insomnia                                                                    |                                    |                                      |                                   | 194 (15.3)                               |
|                 | Cravings                                                                    |                                    |                                      |                                   | 298 (23.5)                               |
|                 | Headache                                                                    |                                    |                                      |                                   | 432 (34.0)                               |
|                 | Constipation                                                                |                                    |                                      |                                   | 205 (16.1)                               |
|                 | Diarrhoea                                                                   |                                    |                                      |                                   | 143 (11.3)                               |
|                 | Bad Mood                                                                    |                                    |                                      |                                   | 641 (50.5)                               |
|                 | Mood Swings                                                                 |                                    |                                      |                                   | 541 (42.6)                               |
|                 | Depression                                                                  |                                    |                                      |                                   | 224 (17.6)                               |
|                 | Anxiety                                                                     |                                    |                                      |                                   | 333 (26.2)                               |
|                 | Discharge                                                                   |                                    |                                      |                                   | 462 (36.4)                               |
|                 | Ovulation                                                                   |                                    |                                      |                                   | 668 (52.6)                               |
|                 | Other                                                                       |                                    |                                      |                                   | 48 (3.8)                                 |
| 19              | <b>Part of App</b>                                                          |                                    |                                      |                                   | <b>Frequency, n (%)</b>                  |
|                 | Reading/watching articles in the app                                        |                                    |                                      |                                   | 787 (62.0)                               |
|                 | Chats with Flo's Chatbot                                                    |                                    |                                      |                                   | 714 (56.2)                               |
|                 | Discussion in Secret Chats                                                  |                                    |                                      |                                   | 458 (36.1)                               |
|                 | Courses with Experts                                                        |                                    |                                      |                                   | 256 (20.2)                               |
|                 | Period Predictions                                                          |                                    |                                      |                                   | 935 (73.6)                               |
|                 | Fertile Days and Ovulation Predictions                                      |                                    |                                      |                                   | 797 (62.8)                               |
|                 | Symptom Tracking                                                            |                                    |                                      |                                   | 784 (61.7)                               |
|                 | Other                                                                       |                                    |                                      |                                   | 9 (0.7)                                  |
| 21              | <b>Yes, n (%)</b><br>309 (65.1)                                             |                                    |                                      |                                   | <b>No, n (%)</b><br>166 (34.9)           |
| 23              | <b>Part of App</b>                                                          |                                    |                                      |                                   | <b>n, (%)</b>                            |
|                 | Reading/watching articles in the app                                        |                                    |                                      |                                   | 141 (45.6)                               |
|                 | Chats with Flo's Chatbot                                                    |                                    |                                      |                                   | 161 (52.1)                               |
|                 | Discussion in Secret Chats                                                  |                                    |                                      |                                   | 92 (29.8)                                |
|                 | Courses with Experts                                                        |                                    |                                      |                                   | 69 (22.3)                                |
|                 | Period Predictions                                                          |                                    |                                      |                                   | 212 (68.6)                               |
|                 | Fertile Days and Ovulation Predictions                                      |                                    |                                      |                                   | 167 (54.0)                               |
|                 | Symptom Tracking                                                            |                                    |                                      |                                   | 189 (61.1)                               |
|                 | Other                                                                       |                                    |                                      |                                   | 5 (1.6)                                  |
| 46              | <b>Yes, n (%)</b><br>1292 (89.0)                                            |                                    |                                      |                                   | <b>No, n (%)</b><br>160 (11.0)           |
| 47              | <b>Area of Knowledge</b>                                                    |                                    |                                      |                                   | <b>Frequency, n (%)</b>                  |
|                 | I know my cycle is regular/irregular                                        |                                    |                                      |                                   | 1085 (84.0)                              |
|                 | I know my cycle length is normal/abnormal                                   |                                    |                                      |                                   | 978 (75.7)                               |
|                 | I know my period flow is normal/abnormal                                    |                                    |                                      |                                   | 651 (50.4)                               |
|                 | I know I am/am not ovulating                                                |                                    |                                      |                                   | 713 (55.2)                               |
|                 | I know its normal/not normal to have certain symptoms throughout my cycle   |                                    |                                      |                                   | 755 (58.4)                               |
|                 | I know if my vaginal discharge is healthy throughout my cycle               |                                    |                                      |                                   | 596 (46.1)                               |
|                 | Flo encouraged me to see a doctor, and I've been diagnosed with a condition |                                    |                                      |                                   | 94 (7.3)                                 |
|                 | Identify issues related to PCOS                                             |                                    |                                      |                                   | 111 (8.6)                                |
|                 | Identify issues related to endometriosis                                    |                                    |                                      |                                   | 58 (4.5)                                 |
|                 | Identify issues related to perimenopause                                    |                                    |                                      |                                   | 33 (2.6)                                 |
|                 | Decrease negative effects of PMS                                            |                                    |                                      |                                   | 256 (19.8)                               |
|                 | Helped me communicate more about my cycle to my partner                     |                                    |                                      |                                   | 402 (31.1)                               |
|                 | Other                                                                       |                                    |                                      |                                   | 14 (1.1)                                 |
| 48              | <b>Not at all, n (%)</b><br>12 (0.9)                                        | <b>Little, n (%)</b><br>175 (13.5) | <b>Moderate, n (%)</b><br>495 (30.6) | <b>A lot, n (%)</b><br>452 (35.0) | <b>A great deal, n (%)</b><br>258 (20.0) |
| 49              | <b>Part of App</b>                                                          |                                    |                                      |                                   | <b>Frequency, n (%)</b>                  |
|                 | Reading/watching articles in the app                                        |                                    |                                      |                                   | 654 (50.6)                               |
|                 | Chats with Flo's Chatbot                                                    |                                    |                                      |                                   | 629 (48.7)                               |
|                 | Discussion in Secret Chats                                                  |                                    |                                      |                                   | 407 (31.5)                               |
|                 | Courses with Experts                                                        |                                    |                                      |                                   | 220 (17.0)                               |
|                 | Period Predictions                                                          |                                    |                                      |                                   | 805 (62.3)                               |
|                 | Fertile Days and Ovulation Predictions                                      |                                    |                                      |                                   | 752 (58.2)                               |
|                 | Symptom Tracking                                                            |                                    |                                      |                                   | 657 (50.9)                               |
|                 | Other                                                                       |                                    |                                      |                                   | 12 (1.0)                                 |
| 51              | <b>Area Better Understood</b><br>How to manage your menstrual symptoms      |                                    |                                      |                                   | <b>Frequency, n (%)</b><br>603 (46.7)    |

|                                                         |            |
|---------------------------------------------------------|------------|
| How your cycle affects mental health                    | 765 (59.2) |
| How your cycle affects physical health                  | 776 (60.1) |
| How your cycle affects your reaction to situations      | 572 (44.3) |
| How to use your cycle to know when you are most fertile | 780 (60.4) |
| How to optimize your life around your cycle             | 525 (40.6) |
| None of the above                                       | 56 (4.3)   |
| Other                                                   | 8 (0.6)    |

---

**Table S2.** Pregnancy responses.

| <b>Question</b> |                                                 | <b>Response</b>                |
|-----------------|-------------------------------------------------|--------------------------------|
| 29              | <b>Yes, n (%)</b><br>627 (76.1)                 | <b>No, n (%)</b><br>197 (23.9) |
| 30              | <b>Yes, n (%)</b><br>461 (73.5)                 | <b>No, n (%)</b><br>166 (26.5) |
| 31              | <b>Part of App</b>                              | <b>Frequency, n (%)</b>        |
|                 | Reading/watching articles in the app            | 108 (23.4)                     |
|                 | Chats with Flo's Chatbot                        | 96 (20.8)                      |
|                 | Discussion in Secret Chats                      | 58 (12.6)                      |
|                 | Courses with Experts                            | 47 (10.2)                      |
|                 | Period Predictions                              | 274 (59.4)                     |
|                 | Fertile Days and Ovulation Predictions          | 451 (97.6)                     |
|                 | Symptom Tracking                                | 191 (41.3)                     |
|                 | Other                                           | 4 (0.8)                        |
| 32              | <b>Yes, n (%)</b><br>530 (84.5)                 | <b>No, n (%)</b><br>97 (15.5)  |
| 33              | <b>Yes, n (%)</b><br>127 (64.5)                 | <b>No, n (%)</b><br>70 (35.5)  |
| 34              | <b>Yes, n (%)</b><br>698 (84.7)                 | <b>No, n (%)</b><br>126 (15.3) |
| 36              | <b>Knowledge Area</b>                           | <b>Frequency, n (%)</b>        |
|                 | Baby Development                                | 577 (82.7)                     |
|                 | Body During Pregnancy                           | 589 (84.4)                     |
|                 | Basic Do's and Don'ts                           | 492 (70.5)                     |
|                 | What symptoms are ok and not during pregnancy   | 505 (72.3)                     |
|                 | Diet and Nutrition during Pregnancy             | 395 (56.6)                     |
|                 | Prenatal Care                                   | 379 (54.3)                     |
|                 | None of the Above                               | 15 (2.1)                       |
|                 | Other                                           | 7 (1.1)                        |
| 38              | <b>Part of App</b>                              | <b>Frequency, n (%)</b>        |
|                 | Reading/watching articles in the app            | 503 (72.1)                     |
|                 | Chats with Flo's Chatbot                        | 220 (31.5)                     |
|                 | Discussion in Secret Chats                      | 230 (33.0)                     |
|                 | Courses with Experts                            | 199 (28.5)                     |
|                 | Period Predictions                              | 258 (37.0)                     |
|                 | Fertile Days and Ovulation Predictions          | 356 (51.0)                     |
|                 | Symptom Tracking                                | 245 (35.1)                     |
|                 | Other                                           | 9 (1.2)                        |
| 39              | <b>Better Understand</b>                        | <b>Frequency, n (%)</b>        |
|                 | Manage Pregnancy Symptoms                       | 403 (57.7)                     |
|                 | How Pregnancy affects mental health             | 384 (55.0)                     |
|                 | How Pregnancy affects physical health           | 509 (72.9)                     |
|                 | How Pregnancy affects reactions                 | 257 (36.8)                     |
|                 | How to optimize your life around your pregnancy | 393 (56.3)                     |
|                 | How to manage postpartum symptoms               | 149 (21.3)                     |
|                 | Reduce risk for preterm labour                  | 167 (23.9)                     |
|                 | None of the Above                               | 62 (8.9)                       |
|                 | Other                                           | 3 (0.4)                        |

**Table S3.** General health responses.

| Question | Response                                  |                          |                      |                        |                     |                            |
|----------|-------------------------------------------|--------------------------|----------------------|------------------------|---------------------|----------------------------|
| 53       | <b>Area of Improvement</b>                | <b>Frequency, n (%)</b>  |                      |                        |                     |                            |
|          | Mental and emotional well-being           | 843 (38.1)               |                      |                        |                     |                            |
|          | Physical Health                           | 589 (26.6)               |                      |                        |                     |                            |
|          | Health Behaviours                         | 621 (28.1)               |                      |                        |                     |                            |
|          | Sexual Health                             | 835 (37.7)               |                      |                        |                     |                            |
|          | Communication with HCP                    | 587 (26.5)               |                      |                        |                     |                            |
|          | None of the above                         | 669 (30.2)               |                      |                        |                     |                            |
| 54       | <b>Improved Area</b>                      | <b>Not at all, n (%)</b> | <b>Little, n (%)</b> | <b>Moderate, n (%)</b> | <b>A lot, n (%)</b> | <b>A great deal, n (%)</b> |
|          | Mental and emotional well-being           | 4 (0.5)                  | 109 (12.9)           | 298 (35.4)             | 274 (32.5)          | 158 (18.7)                 |
|          | Physical Health                           | 3 (0.5)                  | 72 (12.2)            | 203 (34.6)             | 188 (31.9)          | 123 (20.8)                 |
|          | Health Behaviours                         | 8 (1.3)                  | 73 (11.7)            | 222 (35.9)             | 185 (29.7)          | 133 (21.4)                 |
|          | Sexual Health                             | 4 (0.5)                  | 93 (11.1)            | 252 (30.2)             | 290 (34.6)          | 199 (23.7)                 |
| 55       | <b>Mental Health Improvement</b>          | <b>Not at all, n (%)</b> | <b>Little, n (%)</b> | <b>Moderate, n (%)</b> | <b>A lot, n (%)</b> | <b>A great deal, n (%)</b> |
|          | Reducing Stress                           | 29 (3.4)                 | 171 (20.3)           | 327 (38.9)             | 218 (25.8)          | 98 (11.6)                  |
|          | Reducing Anxiety and Worry                | 31 (3.7)                 | 158 (18.7)           | 312 (37.1)             | 241 (28.6)          | 101 (12.0)                 |
|          | Managing low mood and depressive symptoms | 53 (6.3)                 | 187 (22.2)           | 289 (34.4)             | 219 (25.9)          | 95 (11.3)                  |
|          | Improve your ability to control emotions  | 72 (8.5)                 | 192 (22.7)           | 270 (32.1)             | 211 (25.0)          | 98 (11.6)                  |
|          | Being happier                             | 40 (4.7)                 | 196 (23.3)           | 288 (34.1)             | 113 (25.2)          | 106 (12.6)                 |
|          | Having better emotional well-being        | 30 (3.6)                 | 156 (18.5)           | 316 (37.6)             | 236 (28.0)          | 105 (12.4)                 |
|          | Improving self-esteem                     | 81 (9.6)                 | 166 (12.8)           | 256 (30.3)             | 214 (25.4)          | 126 (14.9)                 |
|          | Improving Confidence                      | 80 (9.5)                 | 166 (19.7)           | 260 (30.9)             | 213 (25.2)          | 124 (14.7)                 |
|          | Improving Relationships with others       | 95 (11.3)                | 190 (22.5)           | 242 (28.8)             | 208 (24.6)          | 108 (12.8)                 |
| 56       | <b>Part of App</b>                        | <b>Not at all, n (%)</b> | <b>Little, n (%)</b> | <b>Moderate, n (%)</b> | <b>A lot, n (%)</b> | <b>A great deal, n (%)</b> |
|          | Reading/watching articles in the app      | 70 (8.3)                 | 157 (18.7)           | 254 (30.0)             | 212 (25.1)          | 150 (17.8)                 |
|          | Chats with Flo's Chatbot                  | 84 (10.0)                | 153 (18.2)           | 245 (29.0)             | 217 (25.7)          | 144 (18.2)                 |
|          | Discussion in Secret Chats                | 196 (23.2)               | 160 (19.1)           | 189 (22.4)             | 160 (19.0)          | 138 (16.4)                 |
|          | Courses with Experts                      | 172 (20.4)               | 185 (22.3)           | 226 (26.8)             | 147 (17.4)          | 113 (13.4)                 |
|          | Period Predictions                        | 36 (4.3)                 | 98 (11.7)            | 183 (21.7)             | 299 (35.4)          | 227 (26.9)                 |
|          | Fertile Days and Ovulation Predictions    | 55 (6.5)                 | 96 (11.5)            | 185 (21.9)             | 283 (33.5)          | 224 (26.5)                 |
|          | Symptom Tracking                          | 28 (3.3)                 | 107 (12.8)           | 192 (22.7)             | 296 (35.1)          | 220 (26.1)                 |
| 57       | <b>Physical Health Improvement</b>        | <b>Not at all, n (%)</b> | <b>Little, n (%)</b> | <b>Moderate, n (%)</b> | <b>A lot, n (%)</b> | <b>A great deal, n (%)</b> |
|          | Feeling less fatigued and tired           | 40 (6.8)                 | 134 (22.9)           | 213 (36.1)             | 133 (22.5)          | 69 (11.7)                  |
|          | Having more energy                        | 48 (8.1)                 | 130 (22.2)           | 212 (35.9)             | 127 (21.5)          | 72 (12.2)                  |
|          | Sleeping Better                           | 53 (9.2)                 | 130 (22.0)           | 188 (31.9)             | 139 (23.6)          | 79 (13.4)                  |
|          | Managing your weight                      | 105 (17.8)               | 149 (25.3)           | 169 (28.8)             | 198 (16.6)          | 68 (11.5)                  |
|          | Improving your skin                       | 92 (14.6)                | 151 (25.8)           | 166 (28.1)             | 111 (18.8)          | 69 (11.7)                  |
| 58       | <b>Part of App</b>                        | <b>Not at all, n (%)</b> | <b>Little, n (%)</b> | <b>Moderate, n (%)</b> | <b>A lot, n (%)</b> | <b>A great deal, n (%)</b> |
|          | Reading/watching articles in the app      | 49 (8.3)                 | 126 (21.4)           | 169 (28.8)             | 139 (23.6)          | 106 (18.0)                 |
|          | Chats with Flo's Chatbot                  | 67 (11.4)                | 134 (22.7)           | 155 (26.4)             | 142 (24.1)          | 91 (15.4)                  |
|          | Discussion in Secret Chats                | 133 (22.5)               | 120 (20.3)           | 145 (24.4)             | 107 (18.1)          | 86 (14.6)                  |
|          | Courses with Experts                      | 116 (19.7)               | 128 (21.7)           | 151 (25.8)             | 110 (18.6)          | 84 (14.2)                  |
|          | Period Predictions                        | 39 (6.6)                 | 78 (13.2)            | 136 (23.2)             | 193 (32.7)          | 143 (23.2)                 |
|          | Fertile Days and Ovulation Predictions    | 42 (7.1)                 | 76 (12.9)            | 135 (23.1)             | 190 (32.2)          | 146 (24.7)                 |
|          | Symptom Tracking                          | 18 (3.1)                 | 76 (12.9)            | 165 (28.1)             | 185 (31.4)          | 145 (24.6)                 |
| 59       | <b>Health Behaviour Improvement</b>       | <b>Not at all, n (%)</b> | <b>Little, n (%)</b> | <b>Moderate, n (%)</b> | <b>A lot, n (%)</b> | <b>A great deal, n (%)</b> |
|          | Increased Activity/Exercise               | 74 (11.9)                | 173 (28.0)           | 202 (32.5)             | 115 (18.5)          | 57 (9.2)                   |
|          | Improved Diet                             | 59 (9.5)                 | 150 (24.1)           | 204 (33.0)             | 140 (22.5)          | 68 (10.9)                  |
|          | Better Stress Management                  | 56 (9.0)                 | 153 (24.8)           | 197 (31.7)             | 141 (22.7)          | 74 (11.9)                  |
|          | Reducing Harmful Habits                   | 87 (14.0)                | 155 (25.1)           | 164 (26.4)             | 164 (22.0)          | 87 (12.5)                  |
|          | Better Management of Symptoms             | 25 (4.0)                 | 120 (19.5)           | 195 (31.4)             | 178 (28.6)          | 103 (16.6)                 |
| 60       | <b>Part of App</b>                        | <b>Not at all, n (%)</b> | <b>Little, n (%)</b> | <b>Moderate, n (%)</b> | <b>A lot, n (%)</b> | <b>A great deal, n (%)</b> |
|          | Reading/watching articles in the app      | 40 (6.4)                 | 121 (19.9)           | 183 (29.4)             | 166 (26.7)          | 111 (17.8)                 |
|          | Chats with Flo's Chatbot                  | 68 (10.9)                | 135 (21.7)           | 185 (29.7)             | 142 (22.7)          | 91 (14.7)                  |
|          | Discussion in Secret Chats                | 143 (23.0)               | 146 (23.6)           | 141 (22.7)             | 103 (16.6)          | 88 (14.1)                  |
|          | Courses with Experts                      | 108 (17.4)               | 141 (22.8)           | 161 (25.9)             | 124 (19.9)          | 87 (14.0)                  |
|          | Period Predictions                        | 32 (5.1)                 | 80 (12.7)            | 149 (24.0)             | 197 (31.7)          | 165 (26.5)                 |
|          | Fertile Days and Ovulation Predictions    | 46 (7.4)                 | 89 (14.5)            | 148 (23.8)             | 175 (28.1)          | 163 (26.2)                 |
|          | Symptom Tracking                          | 29 (4.7)                 | 82 (13.3)            | 169 (27.2)             | 182 (29.3)          | 159 (25.6)                 |
| 61       | <b>Sexual Health Improvement</b>          | <b>Not at all, n (%)</b> | <b>Little, n (%)</b> | <b>Moderate, n (%)</b> | <b>A lot, n (%)</b> | <b>A great deal, n (%)</b> |
|          | STI's and how to avoid them               | 208 (24.9)               | 166 (19.9)           | 176 (21.0)             | 161 (19.2)          | 125 (14.9)                 |
|          | The signs and symptoms of STI's           | 225 (27.0)               | 167 (20.0)           | 161 (19.2)             | 161 (19.2)          | 123 (14.7)                 |

|    |                                                                     |                          |                      |                        |                     |                            |
|----|---------------------------------------------------------------------|--------------------------|----------------------|------------------------|---------------------|----------------------------|
|    | Safe Sex                                                            | 139 (16.6)               | 141 (16.9)           | 189 (22.3)             | 205 (24.5)          | 163 (19.5)                 |
|    | Contraception Options                                               | 160 (19.0)               | 145 (17.4)           | 185 (22.1)             | 183 (21.9)          | 164 (19.6)                 |
|    | Signs and Symptoms during sex that are indicative of a health issue | 127 (15.2)               | 151 (18.1)           | 215 (25.6)             | 187 (22.3)          | 157 (18.7)                 |
| 62 | <b>Sexual Health Achieved</b>                                       | <b>Not at all, n (%)</b> | <b>Little, n (%)</b> | <b>Moderate, n (%)</b> | <b>A lot, n (%)</b> | <b>A great deal, n (%)</b> |
|    | Improved Sex Life                                                   | 66 (7.9)                 | 162 (19.5)           | 160 (31.1)             | 207 (24.7)          | 141 (16.8)                 |
|    | More pleasure during sex                                            | 145 (17.3)               | 160 (19.2)           | 224 (26.7)             | 169 (20.2)          | 138 (16.5)                 |
|    | Better understanding of your sexuality                              | 139 (16.6)               | 125 (15.1)           | 235 (28.1)             | 187 (22.3)          | 150 (17.9)                 |
|    | Getting rid of sex related stigmas                                  | 151 (18.0)               | 145 (17.4)           | 210 (25.0)             | 179 (21.4)          | 151 (18.0)                 |
|    | Improved Self-love and self-compassion                              | 97 (11.6)                | 148 (17.8)           | 211 (25.2)             | 209 (25.0)          | 171 (20.4)                 |
| 63 | <b>Part of App</b>                                                  | <b>Not at all, n (%)</b> | <b>Little, n (%)</b> | <b>Moderate, n (%)</b> | <b>A lot, n (%)</b> | <b>A great deal, n (%)</b> |
|    | Reading/watching articles in the app                                | 92 (11.0)                | 190 (22.7)           | 230 (27.6)             | 188 (22.5)          | 136 (16.2)                 |
|    | Chats with Flo's Chatbot                                            | 142 (17.0)               | 160 (29.1)           | 238 (29.6)             | 170 (20.3)          | 126 (15.1)                 |
|    | Discussion in Secret Chats                                          | 186 (22.2)               | 160 (19.1)           | 180 (21.6)             | 161 (19.2)          | 149 (17.8)                 |
|    | Courses with Experts                                                | 185 (22.1)               | 167 (20.0)           | 203 (24.4)             | 166 (19.8)          | 115 (13.7)                 |
|    | Period Predictions                                                  | 56 (6.7)                 | 110 (13.1)           | 223 (26.7)             | 245 (29.3)          | 202 (24.1)                 |
|    | Fertile Days and Ovulation Predictions                              | 51 (6.1)                 | 86 (10.3)            | 212 (25.4)             | 244 (29.2)          | 243 (29.0)                 |
|    | Symptom Tracking                                                    | 53 (6.3)                 | 134 (16.0)           | 221 (26.5)             | 227 (27.1)          | 201 (24.0)                 |
