# Supplementary material for: Characterization of Self-reported Improvements in Knowledge and Health Among Users of Flo Period Tracking App: Cross-sectional Survey
Source: PubMed Central journal article supplement (PMC10173043; doi:10.2196/40427), 2023-04-26
Supplement: mhealth_v11i1e40427_app6.pdf [file mhealth_v11i1e40427_app6.pdf]

## Multimedia appendix 6.

**Table S1.** Age versus reasons for using the app.

| <b>Reason for using the app</b>        | <b>&lt;34 (n, %)</b> | <b>&gt;34 (n, %)</b> | <b>Chi-square (df)</b> | <b>P value</b> |
|----------------------------------------|----------------------|----------------------|------------------------|----------------|
| Menstrual Cycle & ST <sup>a</sup>      | 1481 (81.9)          | 313 (77.4)           | 4.0 (1)                | .046           |
| IC <sup>b</sup> and related conditions | 404 (22.3)           | 69 (17.1)            | 5.1 (1)                | .02            |
| Pregnancy Tracking                     | 690 (38.2)           | 132 (32.7)           | 4.0 (1)                | .04            |
| To help me get pregnant                | 969 (55.0)           | 222 (53.6)           | 0.2 (1)                | .66            |
| To help me not get pregnant            | 214 (11.8)           | 36 (8.9)             | 2.5 (1)                | .11            |
| Pregnancy loss                         | 115 (6.4)            | 36 (8.9)             | 3.0 (1)                | .08            |
| Sexual Health                          | 533 (29.6)           | 92 (22.8)            | 7.0 (1)                | .008           |
| Get tailored health information        | 627 (34.7)           | 106 (26.2)           | 10.2 (1)               | .001           |
| To Learn more about my body            | 759 (42.0)           | 155 (38.3)           | 1.6 (1)                | .20            |

<sup>a</sup>Symptom Tracking (ST)

<sup>b</sup> Irregular Cycles (IC)

**Table S2.** Logistic regression - reasons for using the app versus education (N = 2029).

| <b>Why do you use the Flo app? - Menstrual Cycle and symptom tracking</b>    |            |                    |      |
|------------------------------------------------------------------------------|------------|--------------------|------|
| Variable                                                                     | N (%)      | OR (95% CI)        | P    |
| <b>Education</b>                                                             |            |                    |      |
| Some High School, no Diploma                                                 | 115 (5.7)  | 1 (reference)      | -    |
| High School Graduate or Diploma                                              | 600 (37.4) | 1.98 (1.23 - 3.14) | .004 |
| Associate's Degree                                                           | 139 (6.8)  | 2.20 (1.18 - 4.17) | .01  |
| Bachelor's Degree                                                            | 759 (37.4) | 1.59 (1.00 - 2.48) | .04  |
| Master's Degree                                                              | 373 (18.4) | 1.39 (0.84 - 2.21) | .19  |
| Doctorate Degree                                                             | 43 (2.1)   | 1.22 (0.55 - 2.87) | .64  |
| <b>Why do you use the Flo app? - Irregular cycles and related conditions</b> |            |                    |      |
| Variable                                                                     | N (%)      | OR (95% CI)        | P    |
| <b>Education</b>                                                             |            |                    |      |
| Some High School, no Diploma                                                 | 115 (5.7)  | 1 (reference)      | -    |
| High School Graduate or Diploma                                              | 600 (37.4) | 0.95 (0.60 - 1.51) | .81  |
| Associate's Degree                                                           | 139 (6.8)  | 1.16 (0.66 - 2.03) | .61  |
| Bachelor's Degree                                                            | 759 (37.4) | 0.71 (0.45 - 1.14) | .14  |
| Master's Degree                                                              | 373 (18.4) | 0.62 (0.38 - 1.03) | .06  |
| Doctorate Degree                                                             | 43 (2.1)   | 0.58 (0.22 - 1.37) | .24  |
| <b>Why do you use the Flo app? - Pregnancy tracking</b>                      |            |                    |      |
| Variable                                                                     | N (%)      | OR (95% CI)        | P    |
| <b>Education</b>                                                             |            |                    |      |
| Some High School, no Diploma                                                 | 115 (5.7)  | 1 (reference)      | -    |
| High School Graduate or Diploma                                              | 600 (37.4) | 1.17 (0.76 - 1.83) | .48  |
| Associate's Degree                                                           | 139 (6.8)  | 1.68 (0.99 - 2.86) | .05  |
| Bachelor's Degree                                                            | 759 (37.4) | 1.79 (1.18 - 2.80) | .007 |
| Master's Degree                                                              | 373 (18.4) | 1.80 (1.15 - 2.86) | .01  |
| Doctorate Degree                                                             | 43 (2.1)   | 1.08 (0.49 - 2.29) | .85  |
| <b>Why do you use the Flo app? - Help me get pregnant</b>                    |            |                    |      |
| Variable                                                                     | N (%)      | OR (95% CI)        | P    |
| <b>Education</b>                                                             |            |                    |      |
| Some High School, no Diploma                                                 | 115 (5.7)  | 1 (reference)      | -    |
| High School Graduate or Diploma                                              | 600 (37.4) | 1.24 (0.83 - 1.85) | .29  |
| Associate's Degree                                                           | 139 (6.8)  | 0.92 (0.66 - 1.76) | .77  |
| Bachelor's Degree                                                            | 759 (37.4) | 1.21 (0.82 - 1.80) | .34  |
| Master's Degree                                                              | 373 (18.4) | 1.89 (1.24 - 2.88) | .003 |
| Doctorate Degree                                                             | 43 (2.1)   | 1.14 (0.57 - 2.32) | .71  |
| <b>Why do you use the Flo app? - Help me not get pregnant</b>                |            |                    |      |
| Variable                                                                     | N (%)      | OR (95% CI)        | P    |
| <b>Education</b>                                                             |            |                    |      |
| Some High School, no Diploma                                                 | 115 (5.7)  | 1 (reference)      | -    |
| High School Graduate or Diploma                                              | 600 (37.4) | 1.71 (0.90 - 3.61) | .13  |
| Associate's Degree                                                           | 139 (6.8)  | 1.37 (0.60 - 2.34) | .46  |
| Bachelor's Degree                                                            | 759 (37.4) | 1.20 (0.63 - 2.54) | .60  |
| Master's Degree                                                              | 373 (18.4) | 1.15 (0.57 - 2.52) | .70  |
| Doctorate Degree                                                             | 43 (2.1)   | 0.79 (0.17 - 3.61) | .73  |
| <b>Why do you use the Flo app? - Pregnancy loss</b>                          |            |                    |      |
| Variable                                                                     | N (%)      | OR (95% CI)        | P    |
| <b>Education</b>                                                             |            |                    |      |
| Some High School, no Diploma                                                 | 115 (5.7)  | 1 (reference)      | -    |
| High School Graduate or Diploma                                              | 600 (37.4) | 1.62 (0.73 - 4.30) | .28  |
| Associate's Degree                                                           | 139 (6.8)  | 2.36 (0.94 - 6.78) | .08  |
| Bachelor's Degree                                                            | 759 (37.4) | 1.14 (0.51 - 3.05) | .76  |
| Master's Degree                                                              | 373 (18.4) | 1.30 (0.55 - 3.58) | .57  |
| Doctorate Degree                                                             | 43 (2.1)   | 1.86 (0.46 - 6.87) | .35  |
| <b>Why do you use the Flo app? - Sexual health</b>                           |            |                    |      |
| Variable                                                                     | N (%)      | OR (95% CI)        | P    |
| <b>Education</b>                                                             |            |                    |      |
| Some High School, no Diploma                                                 | 115 (5.7)  | 1 (reference)      | -    |
| High School Graduate or Diploma                                              | 600 (37.4) | 0.99 (0.65 - 1.53) | .97  |
| Associate's Degree                                                           | 139 (6.8)  | 1.08 (0.64 - 1.82) | .78  |
| Bachelor's Degree                                                            | 759 (37.4) | 0.83 (0.55 - 1.28) | .39  |
| Master's Degree                                                              | 373 (18.4) | 0.61 (0.39 - 0.97) | .04  |
| Doctorate Degree                                                             | 43 (2.1)   | 0.48 (0.19 - 1.10) | .10  |
| <b>Why do you use the Flo app? - Get tailored health information</b>         |            |                    |      |
| Variable                                                                     | N (%)      | OR (95% CI)        | P    |
| <b>Education</b>                                                             |            |                    |      |
| Some High School, no Diploma                                                 | 115 (5.7)  | 1 (reference)      | -    |

|                                 |            |                    |     |
|---------------------------------|------------|--------------------|-----|
| High School Graduate or Diploma | 600 (37.4) | 1.18 (0.77 - 1.85) | .45 |
| Associate's Degree              | 139 (6.8)  | 1.03 (0.60 - 1.78) | .91 |
| Bachelor's Degree               | 759 (37.4) | 1.35 (0.89 - 2.10) | .17 |
| Master's Degree                 | 373 (18.4) | 0.90 (0.57 - 1.43) | .63 |
| Doctorate Degree                | 43 (2.1)   | 1.15 (0.53 - 2.42) | .72 |

**Why do you use the Flo app? - Learn more about my body**

| Variable                        | N (%)      | OR (95% CI)        | P   |
|---------------------------------|------------|--------------------|-----|
| <b>Education</b>                |            |                    |     |
| Some High School, no Diploma    | 115 (5.7)  | 1 (reference)      | -   |
| High School Graduate or Diploma | 600 (37.4) | 0.98 (0.65 - 1.46) | .91 |
| Associate's Degree              | 139 (6.8)  | 0.91 (0.56 - 1.50) | .73 |
| Bachelor's Degree               | 759 (37.4) | 0.81 (0.54 - 1.20) | .28 |
| Master's Degree                 | 373 (18.4) | 0.59 (0.39 - 0.91) | .02 |
| Doctorate Degree                | 43 (2.1)   | 0.45 (0.21 - 0.95) | .04 |

**Table S3.** Logistic regression - reasons for using the app versus age (N = 2212).

| <b>Why do you use the Flo app? - Menstrual Cycle and symptom tracking</b>    |             |                    |       |
|------------------------------------------------------------------------------|-------------|--------------------|-------|
| Variable                                                                     | N (%)       | OR (95% CI)        | P     |
| Age                                                                          |             |                    |       |
| 18-24                                                                        | 544 (24.6)  | 1.92 (1.44 - 2.59) | <.001 |
| 25-34                                                                        | 1264 (57.1) | 1 (reference)      | -     |
| 35-44                                                                        | 370 (16.7)  | 0.89 (0.67 - 1.18) | .41   |
| 45-54                                                                        | 34 (1.5)    | 1.01 (0.46 - 2.53) | .99   |
| <b>Why do you use the Flo app? - Irregular cycles and related conditions</b> |             |                    |       |
| Variable                                                                     | N (%)       | OR (95% CI)        | P     |
| Age                                                                          |             |                    |       |
| 18-24                                                                        | 544 (24.6)  | 1.56 (1.24 - 1.97) | <.001 |
| 25-34                                                                        | 1264 (57.1) | 1 (reference)      | -     |
| 35-44                                                                        | 370 (16.7)  | 0.81 (0.59 - 1.09) | .18   |
| 45-54                                                                        | 34 (1.5)    | 1.04 (0.41 - 2.30) | .92   |
| <b>Why do you use the Flo app? - Pregnancy tracking</b>                      |             |                    |       |
| Variable                                                                     | N (%)       | OR (95% CI)        | P     |
| Age                                                                          |             |                    |       |
| 18-24                                                                        | 544 (24.6)  | 0.38 (0.30 - 0.48) | <.001 |
| 25-34                                                                        | 1264 (57.1) | 1 (reference)      | -     |
| 35-44                                                                        | 370 (16.7)  | 0.67 (0.53 - 0.86) | <.001 |
| 45-54                                                                        | 34 (1.5)    | 0.08 (0.01 - 0.26) | <.001 |
| <b>Why do you use the Flo app? - Help me get pregnant</b>                    |             |                    |       |
| Variable                                                                     | N (%)       | OR (95% CI)        | P     |
| Age                                                                          |             |                    |       |
| 18-24                                                                        | 544 (24.6)  | 0.28 (0.23 - 0.35) | <.001 |
| 25-34                                                                        | 1264 (57.1) | 1 (reference)      | -     |
| 35-44                                                                        | 370 (16.7)  | 0.84 (0.67 - 1.07) | .16   |
| 45-54                                                                        | 34 (1.5)    | 0.10 (0.03 - 0.24) | <.001 |
| <b>Why do you use the Flo app? - Help me not get pregnant</b>                |             |                    |       |
| Variable                                                                     | N (%)       | OR (95% CI)        | P     |
| Age                                                                          |             |                    |       |
| 18-24                                                                        | 544 (24.6)  | 2.25 (1.69 - 3.01) | <.001 |
| 25-34                                                                        | 1264 (57.1) | 1 (reference)      | -     |
| 35-44                                                                        | 370 (16.7)  | 1.05 (0.69 - 1.54) | .83   |
| 45-54                                                                        | 34 (1.5)    | 0.30 (0.02 - 1.43) | .24   |
| <b>Why do you use the Flo app? - Pregnancy loss</b>                          |             |                    |       |
| Variable                                                                     | N (%)       | OR (95% CI)        | P     |
| Age                                                                          |             |                    |       |
| 18-24                                                                        | 544 (24.6)  | 0.73 (0.46 - 1.11) | .15   |
| 25-34                                                                        | 1264 (57.1) | 1 (reference)      | -     |
| 35-44                                                                        | 370 (16.7)  | 1.40 (0.92 - 2.09) | .11   |
| 45-54                                                                        | 34 (1.5)    | 0.41 (0.02 - 1.92) | .38   |
| <b>Why do you use the Flo app? - Sexual health</b>                           |             |                    |       |
| Variable                                                                     | N (%)       | OR (95% CI)        | P     |
| Age                                                                          |             |                    |       |
| 18-24                                                                        | 544 (24.6)  | 1.84 (1.49 - 2.28) | <.001 |
| 25-34                                                                        | 1264 (57.1) | 1 (reference)      | -     |
| 35-44                                                                        | 370 (16.7)  | 0.85 (0.65 - 1.12) | .26   |
| 45-54                                                                        | 34 (1.5)    | 0.90 (0.38 - 1.91) | .79   |
| <b>Why do you use the Flo app? - Get tailored health information</b>         |             |                    |       |
| Variable                                                                     | N (%)       | OR (95% CI)        | P     |
| Age                                                                          |             |                    |       |
| 18-24                                                                        | 544 (24.6)  | 2.11 (1.72 - 2.60) | <.001 |
| 25-34                                                                        | 1264 (57.1) | 1 (reference)      | -     |
| 35-44                                                                        | 370 (16.7)  | 0.89 (0.68 - 1.15) | .36   |
| 45-54                                                                        | 34 (1.5)    | 0.51 (0.19 - 1.17) | .14   |
| <b>Why do you use the Flo app? - Learn more about my body</b>                |             |                    |       |
| Variable                                                                     | N (%)       | OR (95% CI)        | P     |
| Age                                                                          |             |                    |       |
| 18-24                                                                        | 544 (24.6)  | 2.13 (1.74 - 2.61) | <.001 |
| 25-34                                                                        | 1264 (57.1) | 1 (reference)      | -     |
| 35-44                                                                        | 370 (16.7)  | 1.10 (0.87 - 1.39) | .43   |
| 45-54                                                                        | 34 (1.5)    | 0.95 (0.45 - 1.91) | .89   |
