# Supplementary material for: Characterization of Self-reported Improvements in Knowledge and Health Among Users of Flo Period Tracking App: Cross-sectional Survey
Source: PubMed Central journal article supplement (PMC10173043; doi:10.2196/40427), 2023-04-26
Supplement: mhealth_v11i1e40427_app7.pdf [file mhealth_v11i1e40427_app7.pdf]

**Multimedia appendix 7.**

**Table S1.** Education level versus cycle health questions.

| Question | Cycle health                                                 | Higher education, n (%) | Lower education, n (%) | Chi-square (df) | P value |
|----------|--------------------------------------------------------------|-------------------------|------------------------|-----------------|---------|
| 16       | Overall, did Flo improve your menstrual symptoms (Yes)       | 610 (77.2)              | 660 (77.5)             | 0.0 (1)         | .92     |
| 17       | Flo improved my ovulation symptoms                           | 352 (54.1)              | 316 (52.2)             | 0.4 (1)         | .55     |
| 17       | Flo improved my bad mood symptoms                            | 309 (47.4)              | 322 (59.9)             | 6.6 (1)         | .01     |
| 17       | Flo improved my cramp symptoms                               | 301 (46.2)              | 320 (52.9)             | 5.3 (1)         | .02     |
| 21       | Did Flo help manage your condition and symptoms? (Yes)       | 143 (65.3)              | 166 (64.8)             | 0.0 (1)         | .99     |
| 25       | Did Flo help you seek a HCP for your condition (Yes)         | 111 (50.7)              | 108 (42.4)             | 3.0 (1)         | .09     |
| 46       | Improvement in cycle health education                        | 647 (90.1)              | 645 (87.9)             | 1.6 (1)         | .20     |
| 47       | Know if my cycle is regular/irregular                        | 532 (82.2)              | 553 (85.7)             | 2.7 (1)         | .10     |
|          | Know if my cycle is normal/abnormal                          | 490 (75.7)              | 488 (75.7)             | 0.0 (1)         | .98     |
|          | Know if my period flow is normal/abnormal                    | 320 (49.5)              | 331 (51.3)             | 0.4 (1)         | .54     |
|          | Know if I am/am not ovulating                                | 351 (54.3)              | 362 (56.1)             | 0.4 (1)         | .53     |
|          | Know if its normal to have certain symptoms throughout cycle | 386 (59.7)              | 369 (57.2)             | 0.7 (1)         | .40     |
|          | Helped me identify whether my discharge was healthy          | 291 (45.0)              | 305 (47.3)             | 0.6 (1)         | .44     |
|          | Encouraged me to see a doctor, and been diagnosed            | 49 (7.6)                | 45 (7.0)               | 0.1 (1)         | .76     |
|          | Helped me identify issues related to PCOS                    | 49 (7.6)                | 62 (9.6)               | 1.5 (1)         | .23     |
|          | Helped me identify issues related to endometriosis           | 18 (2.8)                | 40 (6.2)               | 8.0 (1)         | .004    |
|          | Helped me identify issues related to perimenopause           | 13 (2.0)                | 20 (3.1)               | 1.1 (1)         | .29     |
|          | Helped me decrease negative effects of PMS                   | 130 (20.0)              | 126 (19.5)             | 0.0 (1)         | .86     |
|          | Helped me communicate with my partner about my cycle         | 204 (31.5)              | 198 (30.7)             | 0.0 (1)         | .79     |
| 51       | How to manage your menstrual cycle symptoms                  | 282 (43.6)              | 321 (49.8)             | 4.7 (1)         | .03     |
|          | How your cycle affects your mental health                    | 383 (59.2)              | 382 (59.2)             | 0.0 (1)         | .99     |
|          | How your cycle affects your physical health                  | 388 (60.0)              | 388 (60.2)             | 0.0 (1)         | .99     |
|          | How your cycle affects your reactions to situations          | 277 (42.8)              | 295 (45.7)             | 1.0 (1)         | .32     |
|          | How to use your cycle to know when you are most fertile      | 404 (62.4)              | 376 (58.3)             | 2.2 (1)         | .14     |
|          | How to optimize life around cycle                            | 262 (40.5)              | 263 (40.8)             | 0.0 (1)         | .96     |

**Table S2.** Education level versus general health questions.

| Question                                                                | General health <sup>a</sup>               | Higher education, n (%) | Lower education, n (%) | Chi-square (df) | P value |
|-------------------------------------------------------------------------|-------------------------------------------|-------------------------|------------------------|-----------------|---------|
| 53                                                                      | Sexual Health                             | 408 (34.7)              | 427 (41.2)             | 9.5 (1)         | .002    |
|                                                                         | Physical Health                           | 331 (28.2)              | 258 (24.9)             | 2.9 (1)         | .09     |
|                                                                         | Mental Health                             | 467 (39.8)              | 376 (36.3)             | 2.7 (1)         | .10     |
|                                                                         | Communication with HCP                    | 322 (27.5)              | 265 (25.6)             | 0.9 (1)         | .35     |
|                                                                         | Health Behaviours                         | 353 (30.1)              | 268 (25.8)             | 4.6 (1)         | .03     |
| 55                                                                      | Mental Health                             |                         |                        |                 |         |
|                                                                         | Reducing stress                           | 238 (51.0)              | 188 (50.0)             | 0.0 (1)         | .83     |
|                                                                         | Reducing anxiety and worry                | 228 (48.9)              | 186 (49.5)             | 0.0 (1)         | .91     |
|                                                                         | Managing Low mood and depressive symptoms | 202 (43.4)              | 183 (48.7)             | 2.2 (1)         | .14     |
|                                                                         | Improving ability to control emotions     | 199 (42.6)              | 170 (45.2)             | 0.5 (1)         | .49     |
|                                                                         | Being happier                             | 209 (44.8)              | 185 (49.2)             | 1.5 (1)         | .22     |
|                                                                         | Having better emotional well-being        | 239 (51.1)              | 183 (48.7)             | 0.4 (1)         | .51     |
|                                                                         | Improving self-esteem                     | 202 (43.3)              | 180 (47.9)             | 1.6 (1)         | .20     |
|                                                                         | Improving confidence                      | 202 (43.3)              | 183 (48.6)             | 2.2 (1)         | .13     |
| Improving relationships with others                                     | 181 (38.8)                                | 170 (45.2)              | 3.3 (1)                | .07             |         |
| 57                                                                      | Physical Health                           |                         |                        |                 |         |
|                                                                         | Feeling less fatigued and tired           | 225 (68.0)              | 190 (73.6)             | 2.0 (1)         | .16     |
|                                                                         | Having more energy                        | 224 (67.7)              | 187 (72.4)             | 1.4 (1)         | .24     |
|                                                                         | Sleeping better                           | 221 (66.7)              | 185 (71.7)             | 1.4 (1)         | .23     |
|                                                                         | Managing your weight                      | 180 (54.4)              | 156 (60.5)             | 2.0 (1)         | .16     |
|                                                                         | Improving your skin                       | 181 (54.6)              | 165 (64.0)             | 4.8 (1)         | .03     |
|                                                                         | Improving your fitness                    | 183 (55.3)              | 168 (65.1)             | 5.4 (1)         | .02     |
| 59                                                                      | Health Behaviour                          |                         |                        |                 |         |
|                                                                         | Increased activity/exercise               | 207 (58.6)              | 166 (61.9)             | 0.6 (1)         | .45     |
|                                                                         | Improved diet                             | 226 (64.0)              | 186 (69.4)             | 1.7 (1)         | .19     |
|                                                                         | Better stress management                  | 223 (63.2)              | 189 (70.5)             | 3.4 (1)         | .07     |
|                                                                         | Reducing harmful habits                   | 194 (55.0)              | 185 (69.0)             | 12.1 (1)        | <.001   |
| Better management of symptoms                                           | 262 (74.5)                                | 213 (79.5)              | 1.8 (1)                | .17             |         |
| 61                                                                      | Sexual Health                             |                         |                        |                 |         |
|                                                                         | STI's and how to avoid them               | 199 (48.7)              | 263 (61.4)             | 13.1 (1)        | <.001   |
|                                                                         | The signs and symptoms of STI's           | 185 (45.3)              | 260 (60.7)             | 19.3 (1)        | <.001   |
|                                                                         | Safe Sex                                  | 248 (60.8)              | 309 (72.2)             | 11.7 (1)        | <.001   |
|                                                                         | Contraception Options                     | 236 (57.8)              | 296 (69.2)             | 11.1 (1)        | <.001   |
| The signs and symptoms during sex that are indicative of a health issue | 250 (61.3)                                | 309 (72.2)              | 10.6 (1)               | <.001           |         |
| 62                                                                      | Improved Sex Life                         | 291 (71.3)              | 317 (74.2)             | 0.8 (1)         | .39     |
|                                                                         | More pleasure during sex                  | 241 (59.0)              | 290 (67.9)             | 6.7 (1)         | .009    |
|                                                                         | Better Understanding of your sexuality    | 270 (66.2)              | 302 (70.7)             | 1.8 (1)         | .18     |
|                                                                         | Getting rid of sex related stigmas        | 253 (62.0)              | 287 (67.2)             | 2.2 (1)         | .13     |
|                                                                         | Improved self love and self compassion    | 286 (70.0)              | 305 (71.4)             | 0.1 (1)         | .72     |
| 64                                                                      | Communication with HCP                    |                         |                        |                 |         |
|                                                                         | Asking questions about my health/body     | 223 (69.3)              | 187 (70.6)             | 0.0 (1)         | .80     |
|                                                                         | Asking for resources I think I need       | 137 (42.5)              | 137 (51.7)             | 4.5 (1)         | .03     |
|                                                                         | Sharing with what's going on in my body   | 256 (79.5)              | 195 (73.6)             | 2.5 (1)         | .11     |
| Understanding of my reproductive health                                 | 237 (73.6)                                | 187 (70.6)              | 0.5 (1)                | .47             |         |

<sup>a</sup>All general health questions were compared for participant responses from 'a moderate to a great deal'.

**Table S3.** Education level versus pregnancy questions.

| Question | Pregnancy                                                     | Higher education, n (%) | Lower education, n (%) | Chi-square (df) | P value |
|----------|---------------------------------------------------------------|-------------------------|------------------------|-----------------|---------|
| 29       | Did you get pregnant whilst using Flo? (Yes)                  | 398 (81.3)              | 229 (68.4)             | 17.8 (1)        | <.001   |
| 30       | Did Flo help you get pregnant? (Yes)                          | 290 (72.8)              | 171 (74.7)             | 0.2 (1)         | .69     |
| 32       | Did Flo help you prepare for a healthy pregnancy? (Yes)       | 338 (84.9)              | 192 (83.8)             | 0.1 (1)         | .81     |
| 33       | Did Flo help you prepare for a natural labour? (Yes)          | 28 (30.4)               | 42 (39.6)              | 1.3 (1)         | .25     |
| 34       | Improvement in Pregnancy Education                            | 427 (87.5)              | 271 (80.9)             | 6.2 (1)         | .01     |
| 36       | Know more about my baby development                           | 357 (83.8)              | 220 (81.2)             | 0.6 (1)         | .42     |
|          | Know more about my body during pregnancy                      | 372 (87.3)              | 217 (80.1)             | 6.1 (1)         | .01     |
|          | Know more about the basic do's and don'ts                     | 306 (71.9)              | 186 (68.6)             | 0.7 (1)         | .41     |
|          | Know more about what symptoms are OK and not during pregnancy | 309 (72.6)              | 196 (72.3)             | 0.0 (1)         | .99     |
|          | Know more about diet and nutrition                            | 236 (55.5)              | 159 (58.7)             | 0.6 (1)         | .44     |
|          | Know more about prenatal care                                 | 225 (52.9)              | 154 (56.8)             | 0.9 (1)         | .34     |
| 39       | How to manage your pregnancy symptoms                         | 238 (55.9)              | 165 (60.9)             | 1.5 (1)         | .22     |
|          | How pregnancy affects mental health                           | 229 (53.8)              | 155 (57.2)             | 0.6 (1)         | .42     |
|          | How pregnancy affects physical health                         | 328 (77.0)              | 181 (66.8)             | 8.2 (1)         | .004    |
|          | How pregnancy affects reaction to situations                  | 149 (35.0)              | 108 (39.9)             | 1.5 (1)         | .22     |
|          | How to optimize life around pregnancy                         | 251 (58.8)              | 142 (52.4)             | 2.6 (1)         | .11     |
|          | How to manage postpartum symptoms                             | 77 (18.1)               | 72 (26.6)              | 6.6 (1)         | .01     |
|          | How to reduce risk for preterm labour                         | 91 (21.4)               | 76 (28.0)              | 3.7 (1)         | .05     |
