# Supplementary material for: Characterization of Self-reported Improvements in Knowledge and Health Among Users of Flo Period Tracking App: Cross-sectional Survey
Source: PubMed Central journal article supplement (PMC10173043; doi:10.2196/40427), 2023-04-26
Supplement: mhealth_v11i1e40427_app8.pdf [file mhealth_v11i1e40427_app8.pdf]

## Multimedia appendix 8.

**Table S1.** High-income and low- and middle-income countries versus pregnancy questions.

| Question | Pregnancy                                                     | HIC, n (%) | LMIC, n (%) | Chi-square (df) | P value |
|----------|---------------------------------------------------------------|------------|-------------|-----------------|---------|
| 29       | Did you get pregnant whilst using Flo? (Yes)                  | 489 (79.8) | 138 (65.4)  | 17.0 (1)        | <.001   |
| 30       | Did Flo help you get pregnant? (Yes)                          | 354 (72.3) | 107 (77.5)  | 1.2 (1)         | .27     |
| 32       | Did Flo help you prepare for a healthy pregnancy? (Yes)       | 409 (83.6) | 121 (87.7)  | 1.1 (1)         | .30     |
| 33       | Did Flo help you prepare for natural labour? (Yes)            | 39 (31.5)  | 31 (42.5)   | 2.0 (1)         | .16     |
| 34       | Improvement in Pregnancy Education                            | 525 (85.8) | 173 (82.0)  | 1.5 (1)         | .23     |
| 36       | Know more about my baby development                           | 444 (86.5) | 133 (79.6)  | 4.2 (1)         | .04     |
|          | Know more about my body during pregnancy                      | 447 (87.1) | 142 (85.0)  | 0.6 (1)         | .57     |
|          | Know more about the basic do's and don'ts                     | 369 (71.9) | 123 (73.7)  | 0.1 (1)         | .74     |
|          | Know more about what symptoms are OK and not during pregnancy | 381 (74.3) | 124 (74.3)  | 0.0 (1)         | .99     |
|          | Know more about diet and nutrition                            | 306 (59.7) | 89 (53.3)   | 1.8 (1)         | .18     |
|          | Know more about prenatal care                                 | 289 (56.3) | 90 (53.9)   | 0.2 (1)         | .64     |
| 39       | How to manage your pregnancy symptoms                         | 293 (61.9) | 110 (68.8)  | 2.1 (1)         | .15     |
|          | How pregnancy affects mental health                           | 281 (59.4) | 103 (64.4)  | 1.0 (1)         | .31     |
|          | How pregnancy affects physical health                         | 387 (81.8) | 122 (76.3)  | 2.0 (1)         | .16     |
|          | How pregnancy affects reaction to situations                  | 189 (40.0) | 68 (42.5)   | 0.2 (1)         | .64     |
|          | How to optimize life around pregnancy                         | 289 (62.0) | 100 (62.5)  | 0.0 (1)         | .98     |
|          | How to manage postpartum symptoms                             | 97 (20.5)  | 52 (32.5)   | 8.9 (1)         | .002    |
|          | How to reduce risk for preterm labour                         | 109 (23.0) | 58 (36.3)   | 10.1 (1)        | .002    |

<sup>a</sup> High-income country (HIC), low- and middle-income country (LMIC).

**Table S2.** High-income and low- and middle-income countries versus general health questions.

| Question                                | General health <sup>a</sup>                                             | HIC <sup>b</sup> , n (%) | LMIC <sup>b</sup> ,n (%) | Chi-square (df) | P value |
|-----------------------------------------|-------------------------------------------------------------------------|--------------------------|--------------------------|-----------------|---------|
| 53                                      | Sexual Health                                                           | 526 (34.8)               | 309 (44.2)               | 17.7 (1)        | <.001   |
|                                         | Physical Health                                                         | 354 (23.4)               | 235 (33.6)               | 25.1 (1)        | <.001   |
|                                         | Mental Health                                                           | 553 (36.5)               | 290 (41.5)               | 4.7 (1)         | .03     |
|                                         | Communication with HCP                                                  | 426 (28.2)               | 161 (23.0)               | 6.2 (1)         | .01     |
|                                         | Health Behaviours                                                       | 407 (26.9)               | 214 (30.6)               | 3.1 (1)         | .08     |
| 55                                      | Mental Health                                                           |                          |                          |                 |         |
|                                         | Reducing stress                                                         | 280 (50.6)               | 146 (50.3)               | 0.0 (1)         | .99     |
|                                         | Reducing anxiety and worry                                              | 275 (49.7)               | 139 (47.9)               | 0.2 (1)         | .67     |
|                                         | Managing Low mood and depressive symptoms                               | 258 (46.6)               | 127 (43.8)               | 0.5 (1)         | .47     |
|                                         | Improving ability to control emotions                                   | 239 (43.2)               | 130 (44.8)               | 0.1 (1)         | .71     |
|                                         | Being happier                                                           | 261 (47.2)               | 133 (45.9)               | 0.1 (1)         | .77     |
|                                         | Having better emotional well-being                                      | 274 (49.5)               | 148 (51.0)               | 0.1 (1)         | .74     |
|                                         | Improving self-esteem                                                   | 239 (43.2)               | 143 (49.3)               | 2.6 (1)         | .10     |
|                                         | Improving confidence                                                    | 248 (44.8)               | 137 (47.2)               | 0.3 (1)         | .55     |
|                                         | Improving relationships with others                                     | 218 (39.4)               | 133 (45.9)               | 3.0 (1)         | .08     |
| 57                                      | Physical Health                                                         |                          |                          |                 |         |
|                                         | Feeling less fatigued and tired                                         | 240 (67.8)               | 175 (74.5)               | 2.7 (1)         | .09     |
|                                         | Having more energy                                                      | 235 (66.4)               | 176 (74.9)               | 4.5 (1)         | .03     |
|                                         | Sleeping better                                                         | 230 (65.0)               | 176 (74.9)               | 6.0 (1)         | .01     |
|                                         | Managing your weight                                                    | 195 (55.0)               | 141 (60.0)               | 1.2 (1)         | .27     |
|                                         | Improving your skin                                                     | 200 (56.5)               | 146 (62.1)               | 1.6 (1)         | .20     |
|                                         | Improving your fitness                                                  | 201 (56.8)               | 150 (63.8)               | 2.6 (1)         | .10     |
| 59                                      | Health Behaviour                                                        |                          |                          |                 |         |
|                                         | Increased activity/exercise                                             | 231 (56.8)               | 142 (66.4)               | 5.0 (1)         | .03     |
|                                         | Improved diet                                                           | 263 (64.6)               | 149 (69.6)               | 1.4 (1)         | .24     |
|                                         | Better stress management                                                | 257 (63.1)               | 155 (72.4)               | 5.0 (1)         | .03     |
|                                         | Reducing harmful habits                                                 | 235 (57.7)               | 144 (67.3)               | 5.0 (1)         | .03     |
| Better management of symptoms           | 301 (74.0)                                                              | 175 (81.8)               | 4.6 (1)                  | .04             |         |
| 61                                      | Sexual Health                                                           |                          |                          |                 |         |
|                                         | STI's and how to avoid them                                             | 271 (51.4)               | 191 (61.8)               | 8.1 (1)         | .004    |
|                                         | The signs and symptoms of STI's                                         | 269 (51.0)               | 176 (57.0)               | 2.5 (1)         | .11     |
|                                         | Safe Sex                                                                | 323 (61.3)               | 234 (75.7)               | 17.6 (1)        | <.001   |
|                                         | Contraception Options                                                   | 328 (62.2)               | 204 (66.0)               | 1.0 (1)         | .31     |
|                                         | The signs and symptoms during sex that are indicative of a health issue | 345 (65.5)               | 214 (69.3)               | 1.1 (1)         | .29     |
| 62                                      | Improved Sex Life                                                       | 371 (70.5)               | 237 (76.7)               | 3.4 (1)         | .06     |
|                                         | More pleasure during sex                                                | 319 (60.6)               | 212 (68.6)               | 5.0 (1)         | .03     |
|                                         | Better Understanding of your sexuality                                  | 335 (63.7)               | 237 (76.7)               | 14.7 (1)        | <.001   |
|                                         | Getting rid of sex related stigmas                                      | 333 (63.3)               | 207 (67.0)               | 1.0 (1)         | .32     |
|                                         | Improved self love and self compassion                                  | 364 (69.2)               | 227 (73.5)               | 1.5 (1)         | .22     |
| 64                                      | Communication with HCP                                                  |                          |                          |                 |         |
|                                         | Asking questions about my health/body                                   | 290 (69.4)               | 120 (75.0)               | 1.5 (1)         | .22     |
|                                         | Asking for resources I think I need                                     | 205 (49.0)               | 69 (43.1)                | 1.4 (1)         | .24     |
|                                         | Sharing with what's going on in my body                                 | 335 (80.1)               | 116 (72.5)               | 3.5 (1)         | .06     |
| Understanding of my reproductive health | 308 (73.4)                                                              | 72.5 (72.5)              | 0.0 (1)                  | .85             |         |

<sup>a</sup>All general health questions were compared for participant responses from 'a moderate to a great deal'.

<sup>b</sup> High-income country (HIC), low- and middle-income country (LMIC).

**Table S3.** High-income and low- and middle-income countries versus cycle health questions.

| Question | Cycle health                                                 | HIC, n (%) | LMIC, n (%) | Chi-square (df) | P value |
|----------|--------------------------------------------------------------|------------|-------------|-----------------|---------|
| 16       | Overall, did Flo improve your menstrual symptoms (Yes)       | 848 (81.9) | 422 (94.1)  | 24.4 (1)        | <.001   |
| 17       | Flo improved my ovulation symptoms                           | 450 (53.8) | 218 (52.0)  | 0.3 (1)         | .56     |
| 17       | Flo improved my bad mood symptoms                            | 399 (47.7) | 222 (52.9)  | 2.7 (1)         | .09     |
| 17       | Flo improved my cramp symptoms                               | 438 (52.4) | 203 (48.3)  | 1.8 (1)         | .18     |
| 21       | Did Flo help manage your condition and symptoms? (Yes)       | 210 (77.7) | 99 (86.4)   | 0.1 (1)         | .84     |
| 25       | Did Flo help you seek a HCP for your condition (Yes)         | 131 (40.3) | 88 (59.1)   | 13.7 (1)        | <.001   |
| 46       | Improvement in Cycle Health Education                        | 838 (88.0) | 454 (90.1)  | 2.3 (1)         | .13     |
| 47       | Know if my cycle is regular/irregular                        | 698 (83.5) | 387 (85.4)  | 0.6 (1)         | .43     |
|          | Know if my cycle is normal/abnormal                          | 629 (75.3) | 349 (77.0)  | 0.4 (1)         | .54     |
|          | Know if my period flow is normal/abnormal                    | 400 (47.9) | 251 (55.4)  | 6.3 (1)         | .01     |
|          | Know if I am/am not ovulating                                | 466 (55.9) | 247 (54.5)  | 0.1 (1)         | .70     |
|          | Know if its normal to have certain symptoms throughout cycle | 499 (59.8) | 256 (56.5)  | 1.5 (1)         | .28     |
|          | Helped me identify whether my discharge was healthy          | 382 (45.7) | 214 (47.2)  | 0.2 (1)         | .65     |
|          | Encouraged me to see a doctor, and been diagnosed            | 43 (5.1)   | 51 (11.3)   | 15.3 (1)        | <.001   |
|          | Helped me identify issues related to PCOS                    | 59 (7.1)   | 52 (11.5)   | 6.7 (1)         | .001    |
|          | Helped me identify issues related to endometriosis           | 39 (4.5)   | 19 (4.2)    | 0.1 (1)         | .80     |
|          | Helped me identify issues related to perimenopause           | 17 (2.0)   | 16 (3.5)    | 2.1 (1)         | .15     |
|          | Helped me decrease negative effects of PMS                   | 157 (18.8) | 99 (21.9)   | 1.5 (1)         | .22     |
|          | Helped me communicate with my partner about my cycle         | 280 (33.5) | 122 (26.9)  | 5.7 (1)         | .02     |
| 51       | How to manage your menstrual cycle symptoms                  | 347 (43.6) | 256 (58.3)  | 23.8 (1)        | <.001   |
|          | How your cycle affects your mental health                    | 503 (63.3) | 262 (60.0)  | 1.4 (1)         | .24     |
|          | How your cycle affects your physical health                  | 511 (64.3) | 265 (60.4)  | 1.7 (1)         | .19     |
|          | How your cycle affects your reactions to situations          | 383 (48.2) | 189 (43.1)  | 2.8 (1)         | .10     |
|          | How to use your cycle to know when you are most fertile      | 515 (64.8) | 265 (60.4)  | 2.2 (1)         | .14     |
|          | How to optimize life around cycle                            | 324 (40.8) | 201 (45.8)  | 2.7 (1)         | .10     |

<sup>a</sup> High-income country (HIC), low- and middle-income country (LMIC).
