# Supplementary material for: Characterization of Self-reported Improvements in Knowledge and Health Among Users of Flo Period Tracking App: Cross-sectional Survey
Source: PubMed Central journal article supplement (PMC10173043; doi:10.2196/40427), 2023-04-26
Supplement: mhealth_v11i1e40427_app9.pdf [file mhealth_v11i1e40427_app9.pdf]

## Multimedia appendix 9.

**Table S1:** Premium and free users versus pregnancy questions.

| Question | Pregnancy                                                     | Premium, n (%) | Free, n (%) | Chi-square (df) | P value |
|----------|---------------------------------------------------------------|----------------|-------------|-----------------|---------|
| 29       | Did you get pregnant whilst using Flo? (Yes)                  | 475 (85.6)     | 93 (48.5)   | 108.7 (1)       | <.001   |
| 30       | Did Flo help you get pregnant? (Yes)                          | 357 (75.0)     | 62 (66.7)   | 2.5 (1)         | .12     |
| 32       | Did Flo help you prepare for a healthy pregnancy? (Yes)       | 410 (86.3)     | 65 (77.4)   | 4.1 (1)         | .04     |
| 33       | Did Flo help you prepare for a natural labour? (Yes)          | 25 (31.3)      | 39 (39.0)   | 0.7 (1)         | .39     |
| 34       | Improvement in Pregnancy Education                            | 501 (90.6)     | 133 (68.9)  | 51.0 (1)        | <.001   |
| 36       | Know more about my baby development                           | 434 (88.0)     | 88 (70.4)   | 22.3 (1)        | <.001   |
|          | Know more about my body during pregnancy                      | 437 (88.6)     | 99 (79.2)   | 6.9 (1)         | .009    |
|          | Know more about the basic do's and don'ts                     | 372 (75.5)     | 76 (60.8)   | 10.0 (1)        | .002    |
|          | Know more about what symptoms are OK and not during pregnancy | 370 (75.1)     | 89 (71.2)   | 0.6 (1)         | .44     |
|          | Know more about diet and nutrition                            | 304 (61.7)     | 55 (44.0)   | 12.2 (1)        | <.001   |
|          | Know more about prenatal care                                 | 285 (57.8)     | 56 (48.8)   | 6.3 (1)         | .01     |
| 39       | How to manage your pregnancy symptoms                         | 287 (62.1)     | 72 (63.7)   | 0.1 (1)         | .84     |
|          | How pregnancy affects mental health                           | 284 (61.5)     | 63 (55.6)   | 1.0 (1)         | .31     |
|          | How pregnancy affects physical health                         | 388 (84.0)     | 72 (63.7)   | 22.1 (1)        | <.001   |
|          | How pregnancy affects reaction to situations                  | 183 (39.6)     | 39 (43.4)   | 0.4 (1)         | .53     |
|          | How to optimize life around pregnancy                         | 303 (65.6)     | 57 (50.4)   | 8.3 (1)         | .004    |
|          | How to manage postpartum symptoms                             | 87 (18.8)      | 38 (33.6)   | 10.8 (1)        | <.001   |
|          | How to reduce risk for preterm labor                          | 105 (22.7)     | 42 (37.2)   | 9.2 (1)         | .002    |

**Table S2.** Premium and free users versus cycle health questions.

| Question | Cycle health                                                 | Premium, n (%) | Free, n (%) | Chi-square (df) | P value |
|----------|--------------------------------------------------------------|----------------|-------------|-----------------|---------|
| 16       | Overall, did Flo improve your menstrual symptoms (Yes)       | 627 (78.5)     | 541 (78.3)  | 0.0 (1)         | .95     |
| 17       | Flo improved my ovulation symptoms                           | 365 (58.8)     | 248 (46.5)  | 17.0 (1)        | <.001   |
| 17       | Flo improved my bad mood symptoms                            | 325 (52.3)     | 272 (50.8)  | 0.2 (1)         | .68     |
| 17       | Flo improved my cramp symptoms                               | 289 (46.5)     | 276 (51.6)  | 2.8 (1)         | .09     |
| 21       | Did Flo help manage your condition and symptoms? (Yes)       | 145 (66.2)     | 135 (64.0)  | 0.1 (1)         | .70     |
| 25       | Did Flo help you seek a HCP for your condition (Yes)         | 93 (42.5)      | 105 (50.0)  | 2.2 (1)         | .14     |
| 46       | Improvement in Cycle Health Education                        | 524 (92.7)     | 646 (87.3)  | 9.7 (1)         | .002    |
| 47       | Know if my cycle is regular/irregular                        | 430 (82.2)     | 555 (86.0)  | 2.9 (1)         | .09     |
|          | Know if my cycle is normal/abnormal                          | 401 (76.7)     | 481 (74.6)  | 0.6 (1)         | .45     |
|          | Know if my period flow is normal/abnormal                    | 272 (52.0)     | 312 (48.4)  | 1.4 (1)         | .24     |
|          | Know if I am/am not ovulating                                | 303 (57.9)     | 356 (55.2)  | 0.8 (1)         | .38     |
|          | Know if its normal to have certain symptoms throughout cycle | 345 (66.0)     | 354 (58.9)  | 14.3 (1)        | <.001   |
|          | Helped me identify whether my discharge was healthy          | 276 (52.8)     | 268 (41.6)  | 14.2 (1)        | <.001   |
|          | Encouraged me to see a doctor, and been diagnosed            | 34 (6.5)       | 52 (8.1)    | 0.8 (1)         | .37     |
|          | Helped me identify issues related to PCOS                    | 45 (8.7)       | 56 (8.6)    | 0.0 (1)         | .99     |
|          | Helped me identify issues related to endometriosis           | 26 (5.0)       | 26 (4.0)    | 0.4 (1)         | .53     |
|          | Helped me identify issues related to perimenopause           | 11 (2.1)       | 16 (2.5)    | 0.0 (1)         | .82     |
|          | Helped me decrease negative effects of PMS                   | 117 (22.4)     | 109 (16.9)  | 5.2 (1)         | .02     |
|          | Helped me communicate with my partner about my cycle         | 209 (40.0)     | 160 (24.8)  | 30.0 (1)        | <.001   |
| 51       | How to manage your menstrual cycle symptoms                  | 227 (45.4)     | 320 (51.8)  | 4.3 (1)         | .04     |
|          | How your cycle affects your mental health                    | 321 (64.2)     | 366 (59.2)  | 2.7 (1)         | .10     |
|          | How your cycle affects your physical health                  | 341 (68.2)     | 360 (58.3)  | 11.3 (1)        | <.001   |
|          | How your cycle affects your reactions to situations          | 245 (49.0)     | 264 (42.7)  | 4.1 (1)         | .04     |
|          | How to use your cycle to know when you are most fertile      | 343 (68.6)     | 359 (58.0)  | 12.6 (1)        | <.001   |
|          | How to optimize life around cycle                            | 230 (46.0)     | 256 (41.4)  | 2.2 (1)         | .14     |

**Table S3.** Premium and free users versus general health questions.

| Question                                                                | General health <sup>a</sup>               | Premium, n (%) | Free, n (%) | Chi-square (df) | P value |
|-------------------------------------------------------------------------|-------------------------------------------|----------------|-------------|-----------------|---------|
| 53                                                                      | Sexual Health                             | 421 (39.1)     | 336 (36.8)  | 1.0 (1)         | .31     |
|                                                                         | Physical Health                           | 313 (29.1)     | 221 (24.1)  | 5.7 (1)         | .02     |
|                                                                         | Mental Health                             | 439 (40.7)     | 321 (35.0)  | 6.6 (1)         | .01     |
|                                                                         | Communication with HCP                    | 345 (32.2)     | 183 (20.0)  | 35.9 (1)        | <.001   |
|                                                                         | Health Behaviours                         | 354 (32.9)     | 208 (22.7)  | 24.3 (1)        | <.001   |
| 55                                                                      | Mental Health                             |                |             |                 |         |
|                                                                         | Reducing stress                           | 230 (52.2)     | 154 (47.9)  | 1.3 (1)         | .26     |
|                                                                         | Reducing anxiety and worry                | 218 (49.7)     | 152 (47.4)  | 0.3 (1)         | .57     |
|                                                                         | Managing Low mood and depressive symptoms | 207 (47.2)     | 233 (43.0)  | 1.1 (1)         | .29     |
|                                                                         | Improving ability to control emotions     | 197 (44.9)     | 133 (41.4)  | 0.9 (1)         | .38     |
|                                                                         | Being happier                             | 213 (48.5)     | 141 (44.0)  | 1.4 (1)         | .24     |
|                                                                         | Having better emotional well-being        | 223 (50.8)     | 154 (48.0)  | 0.5 (1)         | .49     |
|                                                                         | Improving self-esteem                     | 194 (44.2)     | 144 (44.9)  | 0.0 (1)         | .91     |
|                                                                         | Improving confidence                      | 195 (44.34)    | 150 (46.7)  | 0.3 (1)         | .58     |
|                                                                         | Improving relationships with others       | 176 (40.1)     | 137 (42.7)  | 0.4 (1)         | .52     |
| 57                                                                      | Physical Health                           |                |             |                 |         |
|                                                                         | Feeling less fatigued and tired           | 220 (70.0)     | 156 (70.6)  | 0.0 (1)         | .99     |
|                                                                         | Having more energy                        | 217 (69.1)     | 156 (70.6)  | 0.1 (1)         | .83     |
|                                                                         | Sleeping better                           | 217 (69.1)     | 157 (71.0)  | 0.1 (1)         | .74     |
|                                                                         | Managing your weight                      | 180 (57.3)     | 124 (56.1)  | 0.1 (1)         | .82     |
|                                                                         | Improving your skin                       | 185 (58.9)     | 130 (58.9)  | 0.0 (1)         | .99     |
|                                                                         | Improving your fitness                    | 185 (58.9)     | 132 (59.7)  | 0.0 (1)         | .96     |
| 59                                                                      | Health Behaviour                          |                |             |                 |         |
|                                                                         | Increased activity/exercise               | 217 (61.3)     | 127 (61.1)  | 0.0 (1)         | .99     |
|                                                                         | Improved diet                             | 242 (68.3)     | 133 (63.9)  | 1.0 (1)         | .33     |
|                                                                         | Better stress management                  | 235 (66.4)     | 140 (67.3)  | 0.0 (1)         | .90     |
|                                                                         | Reducing harmful habits                   | 213 (60.2)     | 132 (63.5)  | 0.5 (1)         | .49     |
| Better management of symptoms                                           | 275 (77.7)                                | 158 (76.0)     | 0.1 (1)     | .72             |         |
| 61                                                                      | Sexual Health                             |                |             |                 |         |
|                                                                         | STI's and how to avoid them               | 220 (52.1)     | 194 (57.6)  | 2.2 (1)         | .14     |
|                                                                         | The signs and symptoms of STI's           | 215 (50.9)     | 180 (53.4)  | 0.4 (1)         | .52     |
|                                                                         | Safe Sex                                  | 274 (64.9)     | 233 (69.1)  | 1.5 (1)         | .23     |
|                                                                         | Contraception Options                     | 263 (62.3)     | 218 (64.7)  | 0.5 (1)         | .42     |
| The signs and symptoms during sex that are indicative of a health issue | 282 (66.8)                                | 221 (65.6)     | 0.1 (1)     | .82             |         |
| 62                                                                      | Improved Sex Life                         | 312 (74.1)     | 244 (72.4)  | 0.1 (1)         | .71     |
|                                                                         | More pleasure during sex                  | 267 (63.4)     | 218 (64.7)  | 0.1 (1)         | .73     |
|                                                                         | Better Understanding of your sexuality    | 284 (67.5)     | 242 (71.8)  | 1.6 (1)         | .20     |
|                                                                         | Getting rid of sex related stigmas        | 280 (66.5)     | 212 (62.9)  | 0.8 (1)         | .37     |
|                                                                         | Improved self love and self compassion    | 304 (72.2)     | 231 (68.5)  | 0.9 (1)         | .34     |
| 64                                                                      | Communication with HCP                    |                |             |                 |         |
|                                                                         | Asking questions about my health/body     | 249 (73.7)     | 125 (68.7)  | 1.2 (1)         | .27     |
|                                                                         | Asking for resources I think I need       | 154 (45.6)     | 89 (48.9)   | 0.4 (1)         | .52     |
|                                                                         | Sharing with what's going on in my body   | 274 (81.1)     | 133 (73.1)  | 4.0 (1)         | .046    |
| Understanding of my reproductive health                                 | 256 (75.7)                                | 124 (68.1)     | 3.1 (1)     | .08             |         |

<sup>a</sup>All general health questions were compared for participant responses from 'a moderate to a great deal'.
