# Supplementary material for: Characterization of Self-reported Improvements in Knowledge and Health Among Users of Flo Period Tracking App: Cross-sectional Survey
Source: PubMed Central journal article supplement (PMC10173043; doi:10.2196/40427), 2023-04-26
Supplement: mhealth_v11i1e40427_app10.pdf [file mhealth_v11i1e40427_app10.pdf]

**Multimedia appendix 10.**

**Table S1.** Frequent and infrequent app use versus pregnancy questions.

| Question | Pregnancy                                                     | Frequent,<br>n (%) | Infrequent,<br>n (%) | Chi-square (df) | P value |
|----------|---------------------------------------------------------------|--------------------|----------------------|-----------------|---------|
| 29       | Did you get pregnant whilst using Flo? (Yes)                  | 555 (80.2)         | 72 (54.1)            | 40.6 (1)        | <.001   |
| 30       | Did Flo help you get pregnant? (Yes)                          | 416 (74.8)         | 45 (62.5)            | 4.5 (1)         | .03     |
| 32       | Did Flo help you prepare for a healthy pregnancy? (Yes)       | 477 (85.8)         | 54 (75.0)            | 4.9 (1)         | .03     |
| 33       | Did Flo help you prepare for a natural labour? (Yes)          | 49 (35.8)          | 21 (34.4)            | <0.1 (1)        | .96     |
| 34       | Improvement in Pregnancy Education                            | 601 (87.0)         | 97 (72.4)            | 16.2 (1)        | <.001   |
| 36       | Know more about my baby development                           | 506 (86.3)         | 71 (75.5)            | 6.6 (1)         | .01     |
|          | Know more about my body during pregnancy                      | 516 (88.1)         | 73 (77.7)            | 6.7 (1)         | .01     |
|          | Know more about the basic do's and don'ts                     | 433 (73.9)         | 59 (62.8)            | 4.5 (1)         | .03     |
|          | Know more about what symptoms are OK and not during pregnancy | 438 (74.7)         | 67 (71.3)            | 0.3 (1)         | .56     |
|          | Know more about diet and nutrition                            | 346 (59.0)         | 49 (52.7)            | 1.3 (1)         | .25     |
|          | Know more about prenatal care                                 | 333 (56.8)         | 46 (48.9)            | 1.7 (1)         | .19     |
| 39       | How to manage your pregnancy symptoms                         | 349 (64.0)         | 54 (61.4)            | 0.1 (1)         | .72     |
|          | How pregnancy affects mental health                           | 333 (61.1)         | 51 (58.0)            | 0.2 (1)         | .66     |
|          | How pregnancy affects physical health                         | 446 (81.8)         | 63 (71.6)            | 4.4 (1)         | .04     |
|          | How pregnancy affects reaction to situations                  | 222 (40.7)         | 35 (40.0)            | 0.0 (1)         | .96     |
|          | How to optimize life around pregnancy                         | 342 (62.8)         | 51 (58.0)            | 0.6 (1)         | .46     |
|          | How to manage postpartum symptoms                             | 123 (22.6)         | 26 (29.5)            | 1.7 (1)         | .19     |
|          | How to reduce risk for preterm labour                         | 143 (26.2)         | 24 (27.3)            | 0.0 (1)         | .94     |

**Table S2.** Frequent and infrequent app use versus cycle health questions.

| Question | Cycle health                                                 | Frequent,<br>n (%) | Infrequent,<br>n (%) | Chi-square (df) | P value |
|----------|--------------------------------------------------------------|--------------------|----------------------|-----------------|---------|
| 16       | Overall, did Flo improve your Menstrual symptoms (Yes)       | 958 (78.5)         | 312 (74.1)           | 3.2 (1)         | .07     |
| 17       | Flo improved my ovulation symptoms                           | 541 (56.7)         | 127 (42.2)           | 19.2 (1)        | <.001   |
| 17       | Flo improved my bad mood symptoms                            | 484 (50.7)         | 157 (51.8)           | 0.1 (1)         | .75     |
| 17       | Flo improved my cramp symptoms                               | 654 (48.6)         | 157 (51.8)           | 0.9 (1)         | .34     |
| 21       | Did Flo help manage your condition and symptoms? (Yes)       | 219 (67.6)         | 90 (59.6)            | 2.6 (1)         | .11     |
| 25       | Did Flo help you seek a HCP for your condition (Yes)         | 156 (48.1)         | 63 (42.0)            | 1.3 (1)         | .25     |
| 46       | Improvement in Cycle Health Education                        | 907 (89.4)         | 385 (88.1)           | 0.4 (1)         | .54     |
| 47       | Know if my cycle is regular/irregular                        | 757 (83.6)         | 328 (85.6)           | 0.7 (1)         | .42     |
|          | Know if my cycle is normal/abnormal                          | 693 (76.6)         | 285 (74.4)           | 0.6 (1)         | .45     |
|          | Know if my period flow is normal/abnormal                    | 463 (51.1)         | 188 (49.0)           | 0.4 (1)         | .54     |
|          | Know if I am/am not ovulating                                | 515 (56.9)         | 198 (51.7)           | 2.7 (1)         | .10     |
|          | Know if its normal to have certain symptoms throughout cycle | 551 (60.9)         | 204 (53.2)           | 6.1 (1)         | .01     |
|          | Helped me identify whether my discharge was healthy          | 432 (47.8)         | 164 (42.8)           | 2.4 (1)         | .12     |
|          | Encouraged me to see a doctor, and been diagnosed            | 71 (7.8)           | 23 (6.0)             | 1.1 (1)         | .30     |
|          | Helped me identify issues related to PCOS                    | 85 (9.4)           | 26 (6.8)             | 2.0 (1)         | .16     |
|          | Helped me identify issues related to endometriosis           | 48 (5.3)           | 10 (2.6)             | 3.9 (1)         | .047    |
|          | Helped me identify issues related to perimenopause           | 21 (2.3)           | 12 (3.1)             | 0.4 (1)         | .52     |
|          | Helped me decrease negative effects of PMS                   | 184 (20.3)         | 72 (18.8)            | 0.3 (1)         | .58     |
|          | Helped me communicate with my partner about my cycle         | 325 (35.9)         | 77 (20.1)            | 30.6 (1)        | <.001   |
| 51       | How to manage your menstrual cycle symptoms                  | 419 (47.9)         | 184 (51.1)           | 0.9 (1)         | .34     |
|          | How your cycle affects your mental health                    | 541 (61.9)         | 224 (62.2)           | 0.0 (1)         | .97     |
|          | How your cycle affects your physical health                  | 558 (63.8)         | 218 (60.6)           | 1.0 (1)         | .31     |
|          | How your cycle affects your reactions to situations          | 395 (45.2)         | 177 (49.2)           | 1.5 (1)         | .23     |
|          | How to use your cycle to know when you are most fertile      | 597 (68.3)         | 183 (50.8)           | 32.7 (1)        | <.001   |
|          | How to optimize life around cycle                            | 370 (42.3)         | 155 (43.1)           | 0.01 (1)        | 0.87    |

**Table S3.** Frequent and infrequent app use versus general health questions.

| Question                                                                | General health <sup>a</sup>               | Frequent, n (%) | Infrequent, n (%) | Chi-square (df) | P value |
|-------------------------------------------------------------------------|-------------------------------------------|-----------------|-------------------|-----------------|---------|
| 53                                                                      | Sexual Health                             | 668 (40.4)      | 167 (29.8)        | 20.2 (1)        | <.001   |
|                                                                         | Physical Health                           | 445 (28.4)      | 144 (25.6)        | 0.3 (1)         | .57     |
|                                                                         | Mental Health                             | 639 (38.7)      | 204 (36.2)        | 1.0 (1)         | .33     |
|                                                                         | Communication with HCP                    | 471 (28.5)      | 116 (20.6)        | 13.1 (1)        | <.001   |
|                                                                         | Health Behaviours                         | 482 (29.2)      | 139 (24.7)        | 3.9 (1)         | .047    |
| 55                                                                      | Mental Health                             |                 |                   |                 |         |
|                                                                         | Reducing stress                           | 315 (49.3)      | 111 (54.4)        | 1.4 (1)         | .23     |
|                                                                         | Reducing anxiety and worry                | 308 (48.2)      | 106 (52.0)        | 0.7 (1)         | .39     |
|                                                                         | Managing Low mood and depressive symptoms | 288 (45.1)      | 97 (47.5)         | 0.29 (1)        | .59     |
|                                                                         | Improving ability to control emotions     | 278 (43.5)      | 91 (44.6)         | 0.1 (1)         | .85     |
|                                                                         | Being happier                             | 299 (46.8)      | 95 (46.6)         | 0.0 (1)         | .99     |
|                                                                         | Having better emotional well-being        | 319 (49.9)      | 103 (50.5)        | 0.0 (1)         | .95     |
|                                                                         | Improving self-esteem                     | 281 (44.0)      | 101 (49.5)        | 1.7 (1)         | .19     |
|                                                                         | Improving confidence                      | 284 (44.4)      | 101 (59.5)        | 1.4 (1)         | .24     |
| Improving relationships with others                                     | 254 (39.7)                                | 97 (47.5)       | 3.6 (1)           | .06             |         |
| 57                                                                      | Physical Health                           |                 |                   |                 |         |
|                                                                         | Feeling less fatigued and tired           | 312 (70.0)      | 103 (71.5)        | 0.1 (1)         | .83     |
|                                                                         | Having more energy                        | 306 (68.8)      | 105 (72.9)        | 0.7 (1)         | .40     |
|                                                                         | Sleeping better                           | 299 (67.2)      | 107 (74.3)        | 2.2 (1)         | .13     |
|                                                                         | Managing your weight                      | 253 (56.9)      | 83 (57.6)         | 0.0 (1)         | .95     |
|                                                                         | Improving your skin                       | 261 (58.7)      | 85 (59.0)         | 0.0 (1)         | .99     |
|                                                                         | Improving your fitness                    | 266 (59.8)      | 85 (59.0)         | 0.0 (1)         | .95     |
| 59                                                                      | Health Behaviour                          |                 |                   |                 |         |
|                                                                         | Increased activity/exercise               | 291 (60.4)      | 82 (58.9)         | 0.1 (1)         | .85     |
|                                                                         | Improved diet                             | 326 (67.6)      | 86 (61.9)         | 1.4 (1)         | .24     |
|                                                                         | Better stress management                  | 317 (65.7)      | 95 (68.3)         | 0.2 (1)         | .64     |
|                                                                         | Reducing harmful habits                   | 295 (61.1)      | 84 (60.4)         | 0.0 (1)         | .95     |
| Better management of symptoms                                           | 371 (77.0)                                | 105 (75.5)      | 0.1 (1)           | .81             |         |
| 61                                                                      | Sexual Health                             |                 |                   |                 |         |
|                                                                         | STI's and how to avoid them               | 374 (55.9)      | 88 (52.3)         | 0.5 (1)         | .51     |
|                                                                         | The signs and symptoms of STI's           | 360 (53.8)      | 85 (50.9)         | 0.4 (1)         | .56     |
|                                                                         | Safe Sex                                  | 446 (66.7)      | 111 (66.5)        | 0.0 (1)         | .99     |
|                                                                         | Contraception Options                     | 427 (63.8)      | 105 (62.9)        | 0.0 (1)         | .89     |
| The signs and symptoms during sex that are indicative of a health issue | 447 (66.8)                                | 112 (67.1)      | 0.0 (1)           | .99             |         |
| 62                                                                      | Improved Sex Life                         | 492 (73.6)      | 116 (69.5)        | 1.0 (1)         | .32     |
|                                                                         | More pleasure during sex                  | 426 (63.8)      | 105 (62.5)        | 0.0 (1)         | .90     |
|                                                                         | Better Understanding of your sexuality    | 460 (68.9)      | 112 (66.7)        | 0.1 (1)         | .72     |
|                                                                         | Getting rid of sex related stigmas        | 428 (64.1)      | 112 (67.1)        | 0.4 (1)         | .53     |
|                                                                         | Improved self love and self compassion    | 473 (70.8)      | 118 (70.6)        | 0.0 (1)         | .99     |
| 64                                                                      | Communication with HCP                    |                 |                   |                 |         |
|                                                                         | Asking questions about my health/body     | 342 (73.3)      | 68 (60.7)         | 6.4 (1)         | .01     |
|                                                                         | Asking for resources I think I need       | 226 (48.5)      | 38 (42.9)         | 0.9 (1)         | .33     |
|                                                                         | Sharing with what's going on in my body   | 366 (78.5)      | 85 (75.9)         | 0.2 (1)         | .63     |
| Understanding of my reproductive health                                 | 355 (76.2)                                | 69 (61.6)       | 9.1 (1)           | .003            |         |

<sup>a</sup>All general health questions were compared for participant responses from 'a moderate to a great deal'.
