# Supplementary material for: Characterization of Self-reported Improvements in Knowledge and Health Among Users of Flo Period Tracking App: Cross-sectional Survey
Source: PubMed Central journal article supplement (PMC10173043; doi:10.2196/40427), 2023-04-26
Supplement: mhealth_v11i1e40427_app11.pdf [file mhealth_v11i1e40427_app11.pdf]

**Multimedia appendix 11.**

**Table S1.** Long- and short-term app use versus cycle health questions.

| Question | Cycle health                                                 | Long-term, n (%) | Short-term, n (%) | Chi-square (df) | P value |
|----------|--------------------------------------------------------------|------------------|-------------------|-----------------|---------|
| 16       | Overall, did Flo improve your menstrual symptoms (Yes)       | 821 (77.8)       | 449 (76.6)        | 0.2 (1)         | .62     |
| 17       | Flo improved my ovulation symptoms                           | 424 (52.1)       | 244 (55.3)        | 1.1 (1)         | .29     |
| 17       | Flo improved my bad mood symptoms                            | 430 (52.7)       | 211 (47.8)        | 2.6 (1)         | .11     |
| 17       | Flo improved my cramp symptoms                               | 414 (50.7)       | 207 (46.9)        | 1.6 (1)         | .21     |
| 21       | Did Flo help manage your condition and symptoms? (Yes)       | 213 (68.1)       | 96 (63.2)         | 3.3 (1)         | .07     |
| 25       | Did Flo help you seek a HCP for your condition (Yes)         | 153 (48.9)       | 66 (41.0)         | 2.4 (1)         | .13     |
| 46       | Improvement in Cycle Health Education                        | 750 (89.4)       | 542 (88.4)        | 0.3 (1)         | .62     |
| 47       | Know if my cycle is regular/irregular                        | 651 (87.0)       | 434 (80.4)        | 10.0 (1)        | .002    |
|          | Know if my cycle is normal/abnormal                          | 586 (78.3)       | 392 (72.6)        | 5.4 (1)         | .02     |
|          | Know if my period flow is normal/abnormal                    | 407 (54.4)       | 244 (45.2)        | 10.3 (1)        | .001    |
|          | Know if I am/am not ovulating                                | 427 (57.1)       | 286 (53.0)        | 2.0 (1)         | .16     |
|          | Know if its normal to have certain symptoms throughout cycle | 465 (62.2)       | 290 (53.7)        | 8.9 (1)         | .003    |
|          | Helped me identify whether my discharge was healthy          | 326 (48.4)       | 234 (43.3)        | 3.0 (1)         | .08     |
|          | Encouraged me to see a doctor, and been diagnosed            | 63 (8.4)         | 31 (5.7)          | 2.9 (1)         | .09     |
|          | Helped me identify issues related to PCOS                    | 78 (10.4)        | 33 (6.1)          | 6.9 (1)         | .009    |
|          | Helped me identify issues related to endometriosis           | 40 (5.3)         | 18 (3.3)          | 2.5 (1)         | .11     |
|          | Helped me identify issues related to perimenopause           | 21 (2.8)         | 12 (2.2)          | 0.2 (1)         | .63     |
|          | Helped me decrease negative effects of PMS                   | 176 (23.5)       | 80 (14.8)         | 14.4 (1)        | <.001   |
|          | Helped me communicate with my partner about my cycle         | 218 (29.1)       | 184 (34.1)        | 3.3 (1)         | .07     |
| 51       | How to manage your menstrual cycle symptoms                  | 374 (51.9)       | 229 (44.6)        | 6.0 (1)         | .01     |
|          | How your cycle affects your mental health                    | 477 (66.2)       | 288 (56.1)        | 12.3 (1)        | <.001   |
|          | How your cycle affects your physical health                  | 486 (67.4)       | 290 (56.5)        | 14.7 (1)        | <.001   |
|          | How your cycle affects your reactions to situations          | 361 (50.0)       | 211 (41.1)        | 9.3 (1)         | .002    |
|          | How to use your cycle to know when you are most fertile      | 433 (60.0)       | 347 (67.4)        | 8.1 (1)         | .008    |
|          | How to optimize life around cycle                            | 326 (45.2)       | 199 (38.8)        | 4.8 (1)         | .03     |

**Table S2.** Long- and short-term app use versus pregnancy questions.

| Question | Pregnancy                                                     | Long-term,<br>n (%) | Short-term,<br>n (%) | Chi-square (df) | P value |
|----------|---------------------------------------------------------------|---------------------|----------------------|-----------------|---------|
| 29       | Did you get pregnant whilst using Flo? (Yes)                  | 405 (81.0)          | 222 (68.5)           | 16.2 (1)        | <.001   |
| 30       | Did Flo help you get pregnant? (Yes)                          | 287 (70.9)          | 174 (78.4)           | 3.8 (1)         | .05     |
| 32       | Did Flo help you prepare for a healthy pregnancy? (Yes)       | 340 (84.0)          | 190 (85.6)           | 0.2 (1)         | .67     |
| 33       | Did Flo help you prepare for a natural labour? (Yes)          | 32 (33.7)           | 38 (37.3)            | 0.1 (1)         | .71     |
| 34       | Improvement in Pregnancy Education                            | 426 (85.4)          | 272 (84.0)           | 0.2 (1)         | .65     |
| 36       | Know more about my baby development                           | 367 (87.4)          | 210 (80.8)           | 5.0 (1)         | .03     |
|          | Know more about my body during pregnancy                      | 368 (87.6)          | 221 (85.0)           | 0.7 (1)         | .39     |
|          | Know more about the basic do's and don'ts                     | 297 (70.7)          | 195 (75.0)           | 1.3 (1)         | .26     |
|          | Know more about what symptoms are OK and not during pregnancy | 324 (77.1)          | 181 (69.6)           | 4.4 (1)         | .04     |
|          | Know more about diet and nutrition                            | 248 (59.0)          | 147 (56.5)           | 0.3 (1)         | .57     |
|          | Know more about prenatal care                                 | 241 (57.4)          | 138 (53.1)           | 1.0 (1)         | .31     |
| 39       | How to manage your pregnancy symptoms                         | 268 (68.5)          | 135 (55.8)           | 10.0 (1)        | .002    |
|          | How pregnancy affects mental health                           | 248 (63.4)          | 136 (56.2)           | 3.0 (1)         | .08     |
|          | How pregnancy affects physical health                         | 318 (81.3)          | 191 (78.9)           | 0.4 (1)         | .52     |
|          | How pregnancy affects reaction to situations                  | 171 (43.7)          | 86 (35.5)            | 3.8 (1)         | .05     |
|          | How to optimize life around pregnancy                         | 252 (64.5)          | 141 (58.3)           | 2.2 (1)         | .14     |
|          | How to manage postpartum symptoms                             | 119 (30.4)          | 30 (12.4)            | 26.0 (1)        | <.001   |
|          | How to reduce risk for preterm labour                         | 117 (29.9)          | 50 (20.7)            | 6.1 (1)         | .01     |

**Table S3.** Long- and short-term app use versus general health questions.

| Question                                                                | General health                            | Long-term,<br>n (%) | Short-term,<br>n (%) | Chi-square (df) | P value |
|-------------------------------------------------------------------------|-------------------------------------------|---------------------|----------------------|-----------------|---------|
| 53                                                                      | Sexual Health                             | 533 (40.9)          | 304 (33.5)           | 11.7 (1)        | <.001   |
|                                                                         | Physical Health                           | 386 (29.5)          | 204 (22.5)           | 13.2 (1)        | <.001   |
|                                                                         | Mental Health                             | 538 (41.2)          | 306 (33.7)           | 12.2 (1)        | <.001   |
|                                                                         | Communication with HCP                    | 347 (26.5)          | 240 (26.5)           | 0.0 (1)         | .99     |
|                                                                         | Health Behaviours                         | 402 (30.8)          | 220 (24.3)           | 10.9 (1)        | <.001   |
| 55                                                                      | Mental Health                             |                     |                      |                 |         |
|                                                                         | Reducing stress                           | 261 (48.5)          | 165 (53.9)           | 2.1 (1)         | .15     |
|                                                                         | Reducing anxiety and worry                | 266 (49.4)          | 148 (48.4)           | 0.0 (1)         | .82     |
|                                                                         | Managing Low mood and depressive symptoms | 250 (46.5)          | 135 (44.1)           | 0.3 (1)         | .56     |
|                                                                         | Improving ability to control emotions     | 237 (44.1)          | 132 (43.1)           | 0.0 (1)         | .85     |
|                                                                         | Being happier                             | 240 (44.6)          | 154 (50.3)           | 2.3 (1)         | .13     |
|                                                                         | Having better emotional well-being        | 260 (48.3)          | 162 (52.9)           | 1.5 (1)         | .22     |
|                                                                         | Improving self-esteem                     | 251 (46.7)          | 131 (42.8)           | 1.0 (1)         | .31     |
|                                                                         | Improving confidence                      | 252 (46.8)          | 133 (43.5)           | 0.8 (1)         | .38     |
| Improving relationships with others                                     | 222 (41.2)                                | 129 (42.2)          | 0.0 (1)              | .86             |         |
| 57                                                                      | Physical Health                           |                     |                      |                 |         |
|                                                                         | Feeling less fatigued and tired           | 277 (71.8)          | 138 (67.6)           | 0.9 (1)         | .34     |
|                                                                         | Having more energy                        | 273 (70.7)          | 138 (67.6)           | 0.5 (1)         | .50     |
|                                                                         | Sleeping better                           | 267 (69.2)          | 139 (68.1)           | 0.0 (1)         | .87     |
|                                                                         | Managing your weight                      | 227 (58.8)          | 109 (53.4)           | 1.4 (1)         | .24     |
|                                                                         | Improving your skin                       | 229 (59.3)          | 117 (57.4)           | 0.1 (1)         | .71     |
|                                                                         | Improving your fitness                    | 237 (61.3)          | 114 (58.9)           | 1.5 (1)         | .23     |
| 59                                                                      | Health Behaviour                          |                     |                      |                 |         |
|                                                                         | Increased activity/exercise               | 247 (61.4)          | 127 (57.7)           | 0.7 (1)         | .41     |
|                                                                         | Improved diet                             | 261 (64.9)          | 152 (69.1)           | 0.9 (1)         | .34     |
|                                                                         | Better stress management                  | 273 (67.9)          | 139 (63.2)           | 1.2 (1)         | .27     |
|                                                                         | Reducing harmful habits                   | 250 (62.2)          | 129 (58.6)           | 0.6 (1)         | .43     |
| Better management of symptoms                                           | 314 (78.1)                                | 162 (73.6)          | 1.3 (1)              | .25             |         |
| 61                                                                      | Sexual Health                             |                     |                      |                 |         |
|                                                                         | STI's and how to avoid them               | 326 (61.0)          | 136 (44.7)           | 20.9 (1)        | <.001   |
|                                                                         | The signs and symptoms of STI's           | 312 (58.4)          | 133 (43.7)           | 16.2 (1)        | <.001   |
|                                                                         | Safe Sex                                  | 380 (71.2)          | 177 (58.2)           | 14.0 (1)        | <.001   |
|                                                                         | Contraception Options                     | 363 (68.0)          | 169 (55.6)           | 12.3 (1)        | <.001   |
| The signs and symptoms during sex that are indicative of a health issue | 376 (70.4)                                | 183 (60.2)          | 8.7 (1)              | .003            |         |
| 62                                                                      | Improved Sex Life                         | 385 (72.2)          | 223 (73.4)           | 0.1 (1)         | .79     |
|                                                                         | More pleasure during sex                  | 339 (63.6)          | 192 (63.2)           | 0.0 (1)         | .96     |
|                                                                         | Better Understanding of your sexuality    | 374 (70.2)          | 198 (65.1)           | 2.0 (1)         | .15     |
|                                                                         | Getting rid of sex related stigmas        | 347 (65.1)          | 193 (63.5)           | 0.2 (1)         | .69     |
|                                                                         | Improved self love and self compassion    | 377 (70.7)          | 214 (70.4)           | 0.0 (1)         | .98     |
| 64                                                                      | Communication with HCP                    |                     |                      |                 |         |
|                                                                         | Asking questions about my health/body     | 240 (80.4)          | 170 (71.7)           | 0.1 (1)         | .8      |
|                                                                         | Asking for resources I think I need       | 167 (49.0)          | 107 (45.1)           | 0.7 (1)         | .67     |
|                                                                         | Sharing with what's going on in my body   | 271 (79.4)          | 180 (75.9)           | 0.8 (1)         | .37     |
| Understanding of my reproductive health                                 | 253 (74.2)                                | 171 (72.2)          | 0.2 (1)              | .65             |         |

<sup>a</sup>All general health questions were compared for participant responses from 'a moderate to a great deal'.
